# Supplementary material for: Modifiable pathways in Alzheimer’s disease: Mendelian randomisation analysis
Source: PubMed Central journal article supplement (PMC5717765; doi:10.1136/bmj.j5375), 2017-12-07
Supplement: lars039122.ww1.pdf [file lars039122.ww1.pdf]

**Appendix 1:** Supplementary tables [posted as supplied by author]

**Table A.** Summary results from meta-analyses of prospective observational studies of potentially modifiable risk factors, including socioeconomic, lifestyle and dietary, cardiometabolic, and inflammatory factors, in relation to Alzheimer’s disease

| Potentially modifiable risk factor                | Direction of association | Relative risk (95% CI) | I <sup>2</sup> | Studies | Reference                      | Included in MR analysis | Reason for not including in MR* |
|---------------------------------------------------|--------------------------|------------------------|----------------|---------|--------------------------------|-------------------------|---------------------------------|
| <b>Socioeconomic factors</b>                      |                          |                        |                |         |                                |                         |                                 |
| Educational attainment (high versus low)          | ↓                        | 0.80 (0.72 to 0.89)    | 93%            | 20      | Xu et al, 2015 <sup>1</sup>    | ✓                       |                                 |
| Educational attainment (low versus high)          | ↑                        | 1.35 (1.12 to 1.58)    | 57%            | 16      | Xu et al, 2015 <sup>1</sup>    | ✓                       |                                 |
| Socioeconomic status (low versus high)†           | ↑                        | 2.55 (1.55 to 3.55)    | 0%             | 4       | Xu et al, 2015 <sup>1</sup>    |                         | 1                               |
| <b>Lifestyle and dietary factors</b>              |                          |                        |                |         |                                |                         |                                 |
| Smoking (current versus non-smoking)              | ↑                        | 1.44 (1.11 to 1.76)    | 77%            | 14      | Xu et al, 2015 <sup>1</sup>    | ✓                       |                                 |
| Alcohol (ever versus never consumption)           | ↓                        | 0.43 (0.17 to 0.69)    | 7%             | 3       | Xu et al, 2015 <sup>1</sup>    | ✓                       |                                 |
| Alcohol (moderate drinking 1-3 drinks/day)        | ↓                        | 0.61 (0.54 to 0.68)    | 0%             | 5       | Xu et al, 2015 <sup>1</sup>    | ✓                       |                                 |
| Coffee (high versus low consumption)              | ↓                        | 0.73 (0.55 to 0.97)    | 0%             | 4       | Liu et al, 2015 <sup>2</sup>   | ✓                       |                                 |
| Physical activity, leisure-time (high versus low) | ↓                        | 0.67 (0.52 to 0.81)    | 81%            | 13      | Xu et al, 2015 <sup>1</sup>    |                         | 1                               |
| 25-hydroxyvitamin D (<50 nmol/L versus above)     | ↑                        | 1.21 (1.01 to 1.40)    | 0%             | 2§      | Shen and Ji, 2015 <sup>3</sup> | ✓                       |                                 |
| Folate levels (low versus high)                   | ↑                        | 1.41 (1.07 to 1.75)    | 0%             | 3       | Xu et al, 2015 <sup>1</sup>    | ✓                       |                                 |
| Folate levels (high versus low)                   | ↓                        | 0.93 (0.88 to 0.98)    | 13%            | 2       | Xu et al, 2015 <sup>1</sup>    | ✓                       |                                 |
| Holotranscobalamin (high versus low)              | ↓                        | 0.98 (0.97 to 1.00)    | 0%             | 2       | Xu et al, 2015 <sup>1</sup>    | ✓¶                      |                                 |
| Vitamin B <sub>12</sub> (high versus low)         | NA                       | 0.93 (0.68 to 1.17)    | 0%             | 2       | Xu et al, 2015 <sup>1</sup>    | ✓¶                      |                                 |
| Total homocysteine levels (high versus low)       | ↑                        | 1.15 (1.02 to 1.27)    | 45%            | 8       | Xu et al, 2015 <sup>1</sup>    | ✓                       |                                 |
| Vitamin C intake (high versus low)                | ↓                        | 0.74 (0.55 to 0.93)    | 0%             | 6       | Xu et al, 2015 <sup>1</sup>    |                         | 1                               |
| Vitamin E intake (high versus low)                | ↓                        | 0.73 (0.62 to 0.84)    | 0%             | 6       | Xu et al, 2015 <sup>1</sup>    |                         | 1                               |
| Eicosapentaenoic acid (high versus low)           | NA                       | 0.96 (0.75 to 1.16)    | 0%             | 3       | Xu et al, 2015 <sup>1</sup>    |                         | 2                               |
| Docosahexaenoic acid (high versus low)            | NA                       | 0.70 (0.37 to 1.03)    | 68%            | 4       | Xu et al, 2015 <sup>1</sup>    |                         | 2                               |
| Total omega-3 fatty acids (high versus low)       | NA                       | 0.81 (0.39 to 1.23)    | 70%            | 3       | Xu et al, 2015 <sup>1</sup>    |                         | 2                               |
| Fish consumption (high versus low)                | ↓                        | 0.66 (0.43 to 0.90)    | 60%            | 6       | Xu et al, 2015 <sup>1</sup>    |                         | 1                               |
| Mediterranean-type dietary pattern                | ↓                        | 0.56 (0.41 to 0.71)    | 46%            | 4       | Xu et al, 2015 <sup>1</sup>    |                         | 1                               |

| <b>Cardiometabolic factors</b>                        |    |                     |     |    |                                 |     |   |
|-------------------------------------------------------|----|---------------------|-----|----|---------------------------------|-----|---|
| Obesity (BMI ≥30 kg/m <sup>2</sup> ) in midlife       | ↑  | 1.61 (1.11 to 2.12) | 69% | 6  | Xu et al, 2015 <sup>1</sup>     | √   |   |
| Obesity (BMI ≥30 kg/m <sup>2</sup> ) in late-life     | ↓  | 0.80 (0.64 to 0.97) | 73% | 9  | Xu et al, 2015 <sup>1</sup>     | √   |   |
| Diabetes in midlife                                   | ↑  | 1.40 (1.25 to 1.57) | 11% | 4  | Meng et al, 2014 <sup>4</sup>   | √   |   |
| Diabetes in midlife and late-life                     | ↑  | 1.33 (1.14 to 1.52) | 70% | 23 | Xu et al, 2015 <sup>1</sup>     | √   |   |
| Fasting insulin levels (high versus low)              | NA | 1.19 (0.96 to 1.42) | 0%  | 3  | Xu et al, 2015 <sup>1</sup>     | √   |   |
| Systolic blood pressure (≥160 mmHg)                   | ↑  | 1.04 (1.01 to 1.08) | 0%  | 5  | Xu et al, 2015 <sup>1</sup>     | √   |   |
| Systolic blood pressure (high versus low) in midlife  | NA | 1.77 (0.93 to 3.37) | 0%  | 3  | Meng et al, 2014 <sup>4</sup>   | √   |   |
| Diastolic blood pressure (high versus low) in midlife | ↑  | 2.38 (1.34 to 4.23) | 0%  | 3  | Meng et al, 2014 <sup>4</sup>   | √   |   |
| Hypercholesterolemia in midlife                       | ↑  | 1.72 (1.32 to 2.24) | 9%  | 4  | Meng et al, 2014 <sup>4</sup>   | √   |   |
| Hypercholesterolemia in midlife and late-life         | NA | 0.94 (0.78 to 1.09) | 86% | 16 | Xu et al, 2015 <sup>1</sup>     | √   |   |
| Metabolic syndrome**                                  | ↓  | 0.71 (0.49 to 0.93) | 37% | 3  | Xu et al, 2015 <sup>1</sup>     | √** |   |
| <b>Inflammatory markers</b>                           |    |                     |     |    |                                 |     |   |
| C-reactive protein levels (high versus low)           | ↑  | 1.21 (1.03 to 1.42) | 0%  | 6  | Koyama et al, 2013 <sup>5</sup> | √   |   |
| Interleukin 6 levels (high versus low)                | NA | 1.06 (0.83 to 1.35) | 0%  | 5  | Koyama et al, 2013 <sup>5</sup> |     | 2 |

BMI = body mass index; CI = confidence interval; MR = Mendelian randomisation; NA = no association. \*Reasons for not assessing the association between the modifiable factor and Alzheimer's disease using the Mendelian randomisation approach were: 1) no genome-wide significant ( $P < 5 \times 10^{-8}$ ) genetic variants associated with the risk factor were identified; 2) no evidence of an association between the modifiable factor and Alzheimer's disease. †Combination of education and income or education and occupation. ‡Inverse association in meta-analysis of 9 case-control studies (0.60; 0.37 to 0.84).<sup>1</sup> §Two prospective studies have been published since this meta-analysis of which one showed an increased risk of Alzheimer's disease associated with vitamin D deficiency (2.85; 1.37 to 5.97),<sup>6</sup> whereas the other study found no association.<sup>7</sup> ¶Holotranscobalamin is as the active form of vitamin B<sub>12</sub> (and may be a more sensitive marker of vitamin B<sub>12</sub> deficiency). Despite of the lack of overall association of vitamin B<sub>12</sub> with Alzheimer's disease, serum vitamin B<sub>12</sub> was included in the Mendelian randomisation analysis because it is one of the main determinants of homocysteine levels. \*\*Components of the metabolic syndrome include abdominal obesity, high triglyceride levels, low high-density lipoprotein cholesterol levels, hypertension, and elevated fasting glucose levels. Each component of the metabolic syndrome (abdominal obesity [waist-to-hip ratio], triglycerides, high-density lipoprotein cholesterol, systolic and diastolic blood pressure, and fasting glucose) was evaluated for an association with Alzheimer's disease in the present Mendelian randomisation analysis.

**Table B.** Genome-wide association studies and number of single nucleotide polymorphisms used as instrumental variable in the Mendelian randomisation analyses of potentially modifiable risk factors in relation to Alzheimer's disease

| Modifiable risk factor                          | Published genome-wide association study of the modifiable risk factor |                     |                                                  |                                          | Present Mendelian randomisation analysis |                                     |                                    |                                            |
|-------------------------------------------------|-----------------------------------------------------------------------|---------------------|--------------------------------------------------|------------------------------------------|------------------------------------------|-------------------------------------|------------------------------------|--------------------------------------------|
|                                                 | Reference                                                             | Maximum sample size | No. of independent genome-wide significant SNPs* | R <sup>2</sup> (%) explained by the SNPs | No. of SNPs included in the analysis     | F statistic (instrumental strength) | Proxies used (r <sup>2</sup> >0.9) | Excluded (no proxy at r <sup>2</sup> >0.9) |
| <b>Education and intelligence</b>               |                                                                       |                     |                                                  |                                          |                                          |                                     |                                    |                                            |
| Years of education                              | Okbay et al, 2016 <sup>8</sup>                                        | 405 072             | 162                                              | 1.6                                      | 152                                      | 5.7                                 | 10                                 | 10                                         |
| College/university                              | Okbay et al, 2016 <sup>8</sup>                                        | 280 007             | 34                                               | NA                                       | 32                                       | NA                                  | 4                                  | 2                                          |
| Intelligence                                    | Sniekers et al, 2017 <sup>9</sup>                                     | 78 307              | 18                                               | 2.0-4.8                                  | 16                                       | 60-144                              |                                    | 2                                          |
| <b>Lifestyle/dietary factors</b>                |                                                                       |                     |                                                  |                                          |                                          |                                     |                                    |                                            |
| Smoking (cigarettes per day)                    | Thorgeirsson et al, 2010 <sup>10</sup>                                | 86 956              | 4                                                | 0.5                                      | 4                                        | 68                                  |                                    |                                            |
| Smoking initiation (ever versus never smoker)   | TGC, 2010 <sup>11</sup>                                               | 143 023             | 1                                                | 0.03                                     | 1                                        | 16                                  |                                    |                                            |
| Smoking cessation (former versus current)       | TGC, 2010 <sup>11</sup>                                               | 64 924              | 1                                                | 0.19                                     | 1                                        | 103                                 |                                    |                                            |
| Alcohol consumption                             | Jorgenson et al, 2017 <sup>12</sup>                                   | 71 071              | 3†                                               | NA                                       | 2                                        | NA                                  |                                    |                                            |
| Coffee consumption                              | Cornelis et al, 2015 <sup>13</sup>                                    | 129 488             | 5                                                | 1.3                                      | 5                                        | 140                                 |                                    |                                            |
| 25-hydroxyvitamin D                             | Vimalaswaran et al, 2013 <sup>14</sup>                                | 42 024              | 4                                                | 3.6                                      | 4                                        | 487                                 |                                    |                                            |
| Serum folate                                    | Grarup et al, 2017 <sup>15</sup>                                      | 37 456              | 2                                                | 1.0                                      | 2                                        | 271                                 |                                    |                                            |
| Serum vitamin B12                               | Grarup et al, 2017 <sup>15</sup>                                      | 45 576              | 11                                               | 6.3                                      | 7                                        | 310                                 |                                    |                                            |
| Total homocysteine                              | van Meurs et al, 2013 <sup>16</sup>                                   | 44 147              | 18                                               | 5.9                                      | 18                                       | 178                                 |                                    |                                            |
| <b>Cardiometabolic factors</b>                  |                                                                       |                     |                                                  |                                          |                                          |                                     |                                    |                                            |
| Body mass index                                 | Locke et al, 2015 <sup>17</sup>                                       | 322 154             | 77‡                                              | 2.4‡                                     | 77                                       | 17‡                                 |                                    |                                            |
| Waist-to-hip ratio adjusted for body mass index | Shungin et al 2015 <sup>18</sup>                                      | 210 023             | 39§                                              | 1.2§                                     | 38                                       | 17§                                 |                                    | 1                                          |
| Type 2 diabetes                                 | Morris et al, 2012 <sup>19</sup>                                      | 149 821             | 50¶                                              | 5.7                                      | 50                                       | 62                                  |                                    |                                            |
| Fasting glucose                                 | Scott et al, 2012 <sup>20</sup>                                       | 133 010             | 36                                               | 4.8                                      | 36                                       | 72                                  |                                    |                                            |
| Fasting insulin                                 | Scott et al, 2012 <sup>20</sup>                                       | 133 010             | 19                                               | 1.2                                      | 19                                       | 34                                  |                                    |                                            |
| Systolic blood pressure                         | Hoffmann et al, 2017 <sup>21</sup>                                    | 321 262             | 103                                              | 2.9                                      | 93                                       | 15                                  | 6                                  | 10                                         |
| Diastolic blood pressure                        | Hoffmann et al, 2017 <sup>21</sup>                                    | 321 262             | 118                                              | 2.5                                      | 105                                      | 11                                  | 7                                  | 13                                         |

|                             |                                   |         |    |      |    |     |   |
|-----------------------------|-----------------------------------|---------|----|------|----|-----|---|
| HDL cholesterol             | GLGC, 2013 <sup>22</sup>          | 188 577 | 71 | 13.7 | 71 | 105 |   |
| LDL cholesterol             | GLGC, 2013 <sup>22</sup>          | 188 577 | 57 | 14.6 | 57 | 139 | 1 |
| Total cholesterol           | GLGC, 2013 <sup>22</sup>          | 188 577 | 74 | 15   | 74 | 110 | 1 |
| Triglycerides               | GLGC, 2013 <sup>22</sup>          | 188 577 | 40 | 11.7 | 40 | 158 | 1 |
| <b>Inflammatory markers</b> |                                   |         |    |      |    |     |   |
| C-reactive protein          | Dehghan et al, 2011 <sup>23</sup> | 82 725  | 18 | 4.9  | 18 | 147 | 2 |

GLGC = Global Lipids Genetics Consortium; HDL = high-density lipoprotein; LDL = low-density lipoprotein; SNP = single nucleotide polymorphism. \*Number of independent genome-wide significant ( $P < 5 \times 10^{-8}$ ) SNPs identified in the sex-combined meta-analysis of discovery and replication samples. Independent was defined as not in linkage disequilibrium ( $r^2 < 0.2$ ) with other SNPs for the same risk factor. †Including two SNPs nearby the *KLB* and *GCKR* genes that were genome-wide significant in the trans-ethnic meta-analysis and one SNP in the *ADH1B* that was highly significant in non-Hispanic whites but not in the combined trans-ethnic sample. ‡SNPs from the primary sex-combined genome-wide meta-analysis of European-descent individuals; twenty genome-wide significant SNPs identified in subgroup-analysis of only women or men or trans-ethnic analysis were not included. Variance and F statistic are estimated on the basis of the 77 SNPs. §SNPs from the primary sex-combined genome-wide meta-analysis of European-descent individuals; eight SNPs that were genome-wide significant in sex-specific analysis only were omitted. Variance and F statistic are estimated on the basis of the 39 SNPs. ¶The 50 SNPs represent the lead SNP for each genome-wide significant loci associated with diabetes of which 39 SNPs were genome-wide significant in the combined meta-analysis by Morris et al, 2012<sup>19</sup> and 11 were significant in earlier genome-wide association studies.<sup>24-26</sup> Summary statistics from Morris et al, 2012<sup>19</sup> were used for all SNPs.

**Table C.** Summary statistics for the genetic variants associated with the modifiable risk factors investigated for an association with Alzheimer's disease in the present Mendelian randomisation study

| Risk factor | SNP        | Chr | Nearest gene | EA | Risk factor |       | Alzheimer's disease results* |        |         |
|-------------|------------|-----|--------------|----|-------------|-------|------------------------------|--------|---------|
|             |            |     |              |    | $\beta$ †   | SE    | $\beta$                      | SE     | P value |
| Education   | rs1008078  | 1   | NA           | C  | 0.017       | 0.002 | -0.0364                      | 0.0163 | 0.0258  |
| Education   | rs11588857 | 1   | NA           | A  | 0.020       | 0.003 | 0.0085                       | 0.0186 | 0.6480  |
| Education   | rs12076635 | 1   | NA           | C  | 0.018       | 0.003 | 0.0124                       | 0.0192 | 0.5202  |
| Education   | rs12134151 | 1   | NA           | G  | 0.013       | 0.002 | 0.0099                       | 0.0157 | 0.5270  |
| Education   | rs12142680 | 1   | NA           | A  | 0.026       | 0.004 | -0.0214                      | 0.0597 | 0.7203  |
| Education   | rs12143094 | 1   | NA           | C  | 0.029       | 0.005 | -0.1470                      | 0.0833 | 0.0775  |
| Education   | rs12145291 | 1   | NA           | C  | 0.029       | 0.005 | -0.0491                      | 0.0340 | 0.1487  |
| Education   | rs12410444 | 1   | NA           | G  | 0.017       | 0.002 | -0.0124                      | 0.0171 | 0.4705  |
| Education   | rs12754946 | 1   | NA           | T  | 0.013       | 0.002 | -0.0155                      | 0.0166 | 0.3505  |
| Education   | rs17372140 | 1   | NA           | G  | 0.014       | 0.002 | -0.0162                      | 0.0174 | 0.3498  |
| Education   | rs1766964  | 1   | NA           | T  | 0.022       | 0.004 | -0.0227                      | 0.0262 | 0.3865  |
| Education   | rs2568955  | 1   | NA           | C  | 0.016       | 0.003 | -0.0241                      | 0.0193 | 0.2124  |
| Education   | rs2992632  | 1   | NA           | A  | 0.016       | 0.002 | -0.0468                      | 0.0178 | 0.0086  |
| Education   | rs301800   | 1   | NA           | T  | 0.016       | 0.003 | -0.0052                      | 0.0195 | 0.7891  |
| Education   | rs34305371 | 1   | NA           | A  | 0.036       | 0.004 | -0.0531                      | 0.0356 | 0.1362  |
| Education   | rs35771425 | 1   | NA           | T  | 0.018       | 0.003 | -0.0007                      | 0.0187 | 0.9693  |
| Education   | rs4378243  | 1   | NA           | T  | 0.018       | 0.003 | -0.0056                      | 0.0219 | 0.8000  |
| Education   | rs56044892 | 1   | NA           | C  | 0.016       | 0.003 | -0.0076                      | 0.0230 | 0.7425  |
| Education   | rs648163   | 1   | NA           | T  | 0.014       | 0.003 | -0.0007                      | 0.0178 | 0.9693  |
| Education   | rs78365243 | 1   | NA           | T  | 0.029       | 0.005 | 0.0214                       | 0.0376 | 0.5695  |
| Education   | rs10178115 | 2   | NA           | T  | 0.014       | 0.002 | -0.0070                      | 0.0158 | 0.6597  |
| Education   | rs10930008 | 2   | NA           | G  | 0.014       | 0.003 | -0.0151                      | 0.0188 | 0.4230  |
| Education   | rs11687170 | 2   | NA           | T  | 0.021       | 0.003 | -0.0321                      | 0.0214 | 0.1340  |
| Education   | rs12694681 | 2   | NA           | T  | 0.014       | 0.002 | 0.0335                       | 0.0176 | 0.0570  |
| Education   | rs12987662 | 2   | NA           | A  | 0.025       | 0.002 | -0.0238                      | 0.0159 | 0.1346  |
| Education   | rs1596747  | 2   | NA           | A  | 0.014       | 0.002 | -0.0289                      | 0.0158 | 0.0671  |
| Education   | rs1606974  | 2   | NA           | A  | 0.022       | 0.003 | -0.0226                      | 0.0259 | 0.3840  |
| Education   | rs16845580 | 2   | NA           | T  | 0.016       | 0.002 | -0.0266                      | 0.0160 | 0.0973  |
| Education   | rs17504614 | 2   | NA           | T  | 0.016       | 0.003 | -0.0629                      | 0.0210 | 0.0028  |
| Education   | rs17824247 | 2   | NA           | C  | 0.016       | 0.002 | 0.0031                       | 0.0158 | 0.8436  |
| Education   | rs268134   | 2   | NA           | A  | 0.014       | 0.003 | 0.0482                       | 0.0178 | 0.0066  |
| Education   | rs34106693 | 2   | NA           | C  | 0.017       | 0.003 | -0.0062                      | 0.0233 | 0.7897  |
| Education   | rs356992   | 2   | NA           | C  | 0.017       | 0.002 | -0.0369                      | 0.0173 | 0.0334  |
| Education   | rs4500960  | 2   | NA           | C  | 0.014       | 0.002 | -0.0233                      | 0.0160 | 0.1454  |
| Education   | rs4675248  | 2   | NA           | G  | 0.012       | 0.002 | -0.0058                      | 0.0159 | 0.7167  |
| Education   | rs4851251  | 2   | NA           | C  | 0.015       | 0.002 | -0.0251                      | 0.0182 | 0.1668  |
| Education   | rs56158183 | 2   | NA           | A  | 0.025       | 0.004 | -0.0595                      | 0.0350 | 0.0893  |
| Education   | rs6715849  | 2   | NA           | G  | 0.015       | 0.002 | 0.0175                       | 0.0156 | 0.2616  |
| Education   | rs71413877 | 2   | NA           | A  | 0.035       | 0.005 | -0.0035                      | 0.0921 | 0.9697  |
| Education   | rs7590368  | 2   | NA           | C  | 0.014       | 0.003 | -0.0007                      | 0.0173 | 0.9685  |
| Education   | rs7593947  | 2   | NA           | A  | 0.015       | 0.002 | -0.0368                      | 0.0163 | 0.0236  |

|           |             |   |    |   |       |       |         |        |        |
|-----------|-------------|---|----|---|-------|-------|---------|--------|--------|
| Education | rs76076331  | 2 | NA | T | 0.020 | 0.003 | 0.0054  | 0.0240 | 0.8230 |
| Education | rs77702819  | 2 | NA | T | 0.022 | 0.004 | 0.0039  | 0.0305 | 0.8973 |
| Education | rs11130222  | 3 | NA | A | 0.025 | 0.002 | 0.0129  | 0.0157 | 0.4097 |
| Education | rs113011189 | 3 | NA | C | 0.025 | 0.004 | -0.0513 | 0.0618 | 0.4063 |
| Education | rs13090388  | 3 | NA | T | 0.026 | 0.002 | -0.0082 | 0.0174 | 0.6394 |
| Education | rs2624818   | 3 | NA | A | 0.021 | 0.004 | -0.0570 | 0.0266 | 0.0319 |
| Education | rs3172494   | 3 | NA | T | 0.023 | 0.003 | 0.0642  | 0.0253 | 0.0113 |
| Education | rs34638686  | 3 | NA | T | 0.023 | 0.004 | -0.0259 | 0.0257 | 0.3142 |
| Education | rs55786114  | 3 | NA | C | 0.030 | 0.004 | 0.0393  | 0.0387 | 0.3105 |
| Education | rs56262138  | 3 | NA | A | 0.014 | 0.002 | 0.0029  | 0.0194 | 0.8828 |
| Education | rs62263033  | 3 | NA | T | 0.037 | 0.006 | -0.1114 | 0.0796 | 0.1619 |
| Education | rs62263923  | 3 | NA | G | 0.017 | 0.002 | 0.0057  | 0.0161 | 0.7243 |
| Education | rs6806509   | 3 | NA | T | 0.018 | 0.003 | 0.0173  | 0.0218 | 0.4271 |
| Education | rs71326918  | 3 | NA | A | 0.022 | 0.004 | 0.0021  | 0.0384 | 0.9562 |
| Education | rs7429990   | 3 | NA | C | 0.015 | 0.003 | 0.0349  | 0.0176 | 0.0473 |
| Education | rs7610856   | 3 | NA | A | 0.012 | 0.002 | 0.0059  | 0.0157 | 0.7081 |
| Education | rs7633857   | 3 | NA | G | 0.014 | 0.002 | 0.0183  | 0.0156 | 0.2404 |
| Education | rs9755467   | 3 | NA | T | 0.019 | 0.003 | -0.0243 | 0.0205 | 0.2367 |
| Education | rs12640626  | 4 | NA | A | 0.013 | 0.002 | 0.0140  | 0.0158 | 0.3740 |
| Education | rs1912528   | 4 | NA | T | 0.014 | 0.002 | -0.0041 | 0.0161 | 0.8005 |
| Education | rs1967109   | 4 | NA | G | 0.017 | 0.003 | -0.0051 | 0.0215 | 0.8125 |
| Education | rs4308415   | 4 | NA | G | 0.013 | 0.002 | -0.0049 | 0.0155 | 0.7513 |
| Education | rs4863692   | 4 | NA | T | 0.017 | 0.002 | 0.0085  | 0.0168 | 0.6132 |
| Education | rs6839705   | 4 | NA | A | 0.015 | 0.002 | -0.0015 | 0.0161 | 0.9245 |
| Education | rs10223052  | 5 | NA | A | 0.016 | 0.002 | -0.0217 | 0.0164 | 0.1856 |
| Education | rs113474297 | 5 | NA | C | 0.021 | 0.003 | -0.0478 | 0.0231 | 0.0380 |
| Education | rs12653396  | 5 | NA | T | 0.013 | 0.002 | 0.0006  | 0.0155 | 0.9716 |
| Education | rs146723842 | 5 | NA | C | 0.014 | 0.002 | 0.0040  | 0.0171 | 0.8144 |
| Education | rs152603    | 5 | NA | G | 0.013 | 0.002 | 0.0013  | 0.0166 | 0.9385 |
| Education | rs1562242   | 5 | NA | C | 0.013 | 0.002 | -0.0079 | 0.0156 | 0.6108 |
| Education | rs4493682   | 5 | NA | C | 0.019 | 0.003 | -0.0041 | 0.0200 | 0.8389 |
| Education | rs61160187  | 5 | NA | G | 0.017 | 0.002 | -0.0267 | 0.0163 | 0.1007 |
| Education | rs62379838  | 5 | NA | T | 0.013 | 0.002 | 0.0010  | 0.0172 | 0.9554 |
| Education | rs660001    | 5 | NA | G | 0.018 | 0.003 | 0.0022  | 0.0194 | 0.9102 |
| Education | rs6882046   | 5 | NA | G | 0.019 | 0.003 | -0.0436 | 0.0170 | 0.0103 |
| Education | rs700590    | 5 | NA | C | 0.019 | 0.002 | -0.0175 | 0.0158 | 0.2695 |
| Education | rs11756123  | 6 | NA | T | 0.015 | 0.002 | -0.0395 | 0.0165 | 0.0163 |
| Education | rs1338554   | 6 | NA | A | 0.015 | 0.002 | -0.0142 | 0.0157 | 0.3650 |
| Education | rs2179152   | 6 | NA | C | 0.013 | 0.002 | -0.0213 | 0.0167 | 0.2035 |
| Education | rs56081191  | 6 | NA | A | 0.028 | 0.004 | 0.0012  | 0.0368 | 0.9750 |
| Education | rs56231335  | 6 | NA | C | 0.017 | 0.002 | -0.0471 | 0.0187 | 0.0117 |
| Education | rs6939294   | 6 | NA | T | 0.016 | 0.003 | -0.0282 | 0.0177 | 0.1113 |
| Education | rs7772172   | 6 | NA | A | 0.013 | 0.002 | 0.0099  | 0.0156 | 0.5251 |
| Education | rs9349957   | 6 | NA | T | 0.021 | 0.003 | 0.0302  | 0.0251 | 0.2291 |
| Education | rs9401593   | 6 | NA | C | 0.024 | 0.002 | -0.0231 | 0.0156 | 0.1393 |
| Education | rs10215082  | 7 | NA | G | 0.014 | 0.002 | 0.0248  | 0.0167 | 0.1364 |
| Education | rs113520408 | 7 | NA | A | 0.015 | 0.002 | 0.0148  | 0.0175 | 0.3991 |
| Education | rs113779084 | 7 | NA | A | 0.014 | 0.002 | 0.0036  | 0.0172 | 0.8331 |

|           |             |    |    |   |       |       |         |        |        |
|-----------|-------------|----|----|---|-------|-------|---------|--------|--------|
| Education | rs11771168  | 7  | NA | C | 0.015 | 0.003 | 0.0171  | 0.0190 | 0.3685 |
| Education | rs11771419  | 7  | NA | A | 0.016 | 0.003 | 0.0033  | 0.0196 | 0.8676 |
| Education | rs11976020  | 7  | NA | G | 0.015 | 0.003 | 0.0028  | 0.0195 | 0.8859 |
| Education | rs12531458  | 7  | NA | A | 0.012 | 0.002 | 0.0004  | 0.0155 | 0.9783 |
| Education | rs12702087  | 7  | NA | A | 0.013 | 0.002 | 0.0109  | 0.0155 | 0.4819 |
| Education | rs17167170  | 7  | NA | A | 0.019 | 0.003 | -0.0244 | 0.0197 | 0.2156 |
| Education | rs2944833   | 7  | NA | G | 0.014 | 0.002 | -0.0112 | 0.0158 | 0.4798 |
| Education | rs320700    | 7  | NA | A | 0.014 | 0.002 | -0.0050 | 0.0162 | 0.7554 |
| Education | rs7791133   | 7  | NA | C | 0.014 | 0.002 | 0.0008  | 0.0161 | 0.9620 |
| Education | rs11774212  | 8  | NA | T | 0.016 | 0.002 | -0.0157 | 0.0174 | 0.3658 |
| Education | rs11782074  | 8  | NA | G | 0.016 | 0.002 | 0.0260  | 0.0164 | 0.1141 |
| Education | rs10818606  | 9  | NA | C | 0.014 | 0.002 | -0.0085 | 0.0161 | 0.5963 |
| Education | rs10821136  | 9  | NA | T | 0.013 | 0.002 | -0.0149 | 0.0163 | 0.3607 |
| Education | rs11998763  | 9  | NA | A | 0.017 | 0.002 | -0.0065 | 0.0157 | 0.6792 |
| Education | rs17425572  | 9  | NA | A | 0.014 | 0.002 | -0.0039 | 0.0156 | 0.8027 |
| Education | rs4741343   | 9  | NA | G | 0.016 | 0.003 | 0.0011  | 0.0206 | 0.9558 |
| Education | rs4741351   | 9  | NA | G | 0.015 | 0.002 | -0.0092 | 0.0182 | 0.6145 |
| Education | rs7029201   | 9  | NA | A | 0.025 | 0.002 | -0.0241 | 0.0172 | 0.1602 |
| Education | rs7033137   | 9  | NA | C | 0.015 | 0.003 | 0.0063  | 0.0203 | 0.7560 |
| Education | rs10761741  | 10 | NA | T | 0.013 | 0.002 | -0.0221 | 0.0156 | 0.1561 |
| Education | rs10786662  | 10 | NA | G | 0.017 | 0.002 | 0.0157  | 0.0155 | 0.3125 |
| Education | rs12761761  | 10 | NA | T | 0.016 | 0.003 | -0.0104 | 0.0194 | 0.5908 |
| Education | rs149613931 | 10 | NA | G | 0.028 | 0.005 | -0.0538 | 0.0341 | 0.1145 |
| Education | rs1925576   | 10 | NA | G | 0.012 | 0.002 | -0.0347 | 0.0155 | 0.0250 |
| Education | rs61874768  | 10 | NA | G | 0.016 | 0.003 | -0.0049 | 0.0209 | 0.8146 |
| Education | rs73344830  | 10 | NA | A | 0.015 | 0.002 | 0.0043  | 0.0161 | 0.7884 |
| Education | rs7914680   | 10 | NA | G | 0.014 | 0.002 | 0.0071  | 0.0170 | 0.6768 |
| Education | rs10444359  | 11 | NA | G | 0.014 | 0.003 | -0.0045 | 0.0188 | 0.8101 |
| Education | rs111321694 | 11 | NA | C | 0.016 | 0.003 | 0.0036  | 0.0239 | 0.8796 |
| Education | rs1550973   | 11 | NA | G | 0.014 | 0.002 | -0.0141 | 0.0171 | 0.4072 |
| Education | rs7945718   | 11 | NA | A | 0.014 | 0.002 | -0.0583 | 0.0169 | 0.0006 |
| Education | rs7948975   | 11 | NA | T | 0.014 | 0.002 | 0.0349  | 0.0183 | 0.0567 |
| Education | rs79925071  | 11 | NA | T | 0.013 | 0.002 | 0.0142  | 0.0178 | 0.4256 |
| Education | rs10772644  | 12 | NA | C | 0.020 | 0.003 | 0.0048  | 0.0255 | 0.8508 |
| Education | rs10773002  | 12 | NA | A | 0.022 | 0.003 | -0.0454 | 0.0177 | 0.0105 |
| Education | rs1389473   | 12 | NA | G | 0.013 | 0.002 | -0.0136 | 0.0166 | 0.4126 |
| Education | rs2456973   | 12 | NA | C | 0.019 | 0.002 | -0.0150 | 0.0164 | 0.3620 |
| Education | rs7964899   | 12 | NA | A | 0.016 | 0.002 | -0.0162 | 0.0156 | 0.2967 |
| Education | rs8002014   | 13 | NA | G | 0.024 | 0.003 | 0.0034  | 0.0185 | 0.8536 |
| Education | rs9556958   | 13 | NA | C | 0.015 | 0.002 | 0.0250  | 0.0158 | 0.1142 |
| Education | rs10483349  | 14 | NA | G | 0.017 | 0.003 | -0.0258 | 0.0199 | 0.1953 |
| Education | rs1115240   | 14 | NA | G | 0.016 | 0.003 | -0.0120 | 0.0177 | 0.4998 |
| Education | rs34344888  | 14 | NA | G | 0.016 | 0.002 | -0.0002 | 0.0159 | 0.9921 |
| Education | rs58694847  | 14 | NA | G | 0.017 | 0.003 | 0.0125  | 0.0177 | 0.4799 |
| Education | rs12900061  | 15 | NA | A | 0.019 | 0.003 | -0.0069 | 0.0207 | 0.7383 |
| Education | rs1378214   | 15 | NA | C | 0.015 | 0.002 | -0.0242 | 0.0159 | 0.1288 |
| Education | rs281302    | 15 | NA | G | 0.013 | 0.002 | -0.0108 | 0.0161 | 0.5023 |
| Education | rs28420834  | 15 | NA | G | 0.014 | 0.002 | -0.0296 | 0.0168 | 0.0784 |

|                    |             |    |             |   |        |        |         |        |        |
|--------------------|-------------|----|-------------|---|--------|--------|---------|--------|--------|
| Education          | rs4076457   | 15 | NA          | T | 0.015  | 0.003  | -0.0055 | 0.0185 | 0.7645 |
| Education          | rs6493271   | 15 | NA          | T | 0.017  | 0.003  | 0.0125  | 0.0204 | 0.5397 |
| Education          | rs11643654  | 16 | NA          | A | 0.013  | 0.002  | -0.0300 | 0.0174 | 0.0841 |
| Education          | rs8049439   | 16 | NA          | T | 0.015  | 0.002  | 0.0196  | 0.0163 | 0.2298 |
| Education          | rs9914544   | 17 | NA          | C | 0.013  | 0.002  | 0.0154  | 0.0159 | 0.3341 |
| Education          | rs12956009  | 18 | NA          | C | 0.013  | 0.002  | 0.0058  | 0.0156 | 0.7077 |
| Education          | rs62100765  | 18 | NA          | C | 0.015  | 0.002  | 0.0263  | 0.0158 | 0.0964 |
| Education          | rs7241530   | 18 | NA          | C | 0.013  | 0.002  | -0.0161 | 0.0192 | 0.4027 |
| Education          | rs9964724   | 18 | NA          | T | 0.018  | 0.002  | -0.0023 | 0.0171 | 0.8930 |
| Education          | rs115945269 | 19 | NA          | C | 0.029  | 0.005  | -0.0087 | 0.1139 | 0.9393 |
| Education          | rs12462428  | 19 | NA          | T | 0.016  | 0.003  | -0.0002 | 0.0201 | 0.9917 |
| Education          | rs1382358   | 19 | NA          | T | 0.020  | 0.003  | -0.0336 | 0.0283 | 0.2353 |
| Education          | rs6065080   | 20 | NA          | C | 0.013  | 0.002  | 0.0116  | 0.0167 | 0.4870 |
| Education          | rs35532491  | 22 | NA          | T | 0.022  | 0.004  | 0.0146  | 0.0258 | 0.5721 |
| Education          | rs7286601   | 22 | NA          | G | 0.014  | 0.002  | 0.0080  | 0.0188 | 0.6713 |
| College/university | rs1008078   | 1  | NA          | C | 0.035  | 0.003  | -0.0364 | 0.0163 | 0.0258 |
| College/university | rs11588857  | 1  | NA          | A | 0.042  | 0.003  | 0.0085  | 0.0186 | 0.6480 |
| College/university | rs34305371  | 1  | NA          | A | 0.073  | 0.005  | -0.0531 | 0.0356 | 0.1362 |
| College/university | rs72943001  | 1  | NA          | C | 0.042  | 0.003  | -0.0152 | 0.0204 | 0.4544 |
| College/university | rs2309757   | 2  | NA          | C | 0.054  | 0.003  | -0.0224 | 0.0160 | 0.1608 |
| College/university | rs2457660   | 2  | NA          | C | 0.035  | 0.003  | -0.0346 | 0.0175 | 0.0484 |
| College/university | rs7597412   | 2  | NA          | C | 0.034  | 0.003  | 0.0188  | 0.0160 | 0.2399 |
| College/university | rs76076331  | 2  | NA          | T | 0.046  | 0.004  | 0.0054  | 0.0240 | 0.8230 |
| College/university | rs11712056  | 3  | NA          | T | 0.049  | 0.003  | -0.0053 | 0.0164 | 0.7475 |
| College/university | rs148734725 | 3  | NA          | A | 0.044  | 0.003  | -0.0069 | 0.0177 | 0.6959 |
| College/university | rs9686024   | 4  | NA          | A | 0.044  | 0.004  | -0.0151 | 0.0213 | 0.4795 |
| College/university | rs10223052  | 5  | NA          | A | 0.035  | 0.003  | -0.0217 | 0.0164 | 0.1856 |
| College/university | rs11241565  | 5  | NA          | C | 0.033  | 0.003  | 0.0023  | 0.0162 | 0.8872 |
| College/university | rs61160187  | 5  | NA          | G | 0.039  | 0.003  | -0.0267 | 0.0163 | 0.1007 |
| College/university | rs6882046   | 5  | NA          | G | 0.043  | 0.003  | -0.0436 | 0.0170 | 0.0103 |
| College/university | rs62422661  | 6  | NA          | T | 0.041  | 0.003  | -0.0322 | 0.0163 | 0.0482 |
| College/university | rs9349957   | 6  | NA          | T | 0.047  | 0.003  | 0.0302  | 0.0251 | 0.2291 |
| College/university | rs12671937  | 7  | NA          | A | 0.039  | 0.003  | 0.0157  | 0.0164 | 0.3382 |
| College/university | rs12699131  | 7  | NA          | A | 0.033  | 0.003  | -0.0137 | 0.0160 | 0.3920 |
| College/university | rs7781266   | 7  | NA          | C | 0.042  | 0.003  | -0.0130 | 0.0184 | 0.4785 |
| College/university | rs7791133   | 7  | NA          | C | 0.034  | 0.003  | 0.0008  | 0.0161 | 0.9620 |
| College/university | rs13294439  | 9  | NA          | C | 0.047  | 0.003  | -0.0239 | 0.0170 | 0.1608 |
| College/university | rs12354486  | 10 | NA          | C | 0.042  | 0.003  | -0.006  | 0.0208 | 0.7735 |
| College/university | rs12797960  | 11 | NA          | C | 0.034  | 0.003  | -0.0425 | 0.0159 | 0.0073 |
| College/university | rs1873982   | 12 | NA          | A | 0.034  | 0.003  | -0.0075 | 0.0160 | 0.6402 |
| College/university | rs2456973   | 12 | NA          | C | 0.037  | 0.003  | -0.015  | 0.0164 | 0.3620 |
| College/university | rs7306755   | 12 | NA          | A | 0.046  | 0.003  | -0.0338 | 0.0192 | 0.0778 |
| College/university | rs8002014   | 13 | NA          | G | 0.049  | 0.003  | 0.0034  | 0.0185 | 0.8536 |
| College/university | rs58694847  | 14 | NA          | G | 0.040  | 0.003  | 0.0125  | 0.0177 | 0.4799 |
| College/university | rs77092939  | 14 | NA          | C | 0.051  | 0.004  | -0.0370 | 0.0286 | 0.1963 |
| College/university | rs117468730 | 16 | NA          | G | 0.116  | 0.009  | -0.0449 | 0.0592 | 0.4491 |
| College/university | rs12957516  | 18 | NA          | T | 0.037  | 0.003  | 0.0193  | 0.0173 | 0.2640 |
| Intelligence       | rs12744310  | 1  | FOXO6/SCMH1 | C | 0.0391 | 0.0067 | -0.0126 | 0.0190 | 0.5080 |



|                         |            |    |                     |   |        |        |         |        |        |
|-------------------------|------------|----|---------------------|---|--------|--------|---------|--------|--------|
| Intelligence            | rs10191758 | 2  | ARHGAP15            | G | 0.0370 | 0.0062 | 0.0112  | 0.0159 | 0.4809 |
| Intelligence            | rs13010010 | 2  | LINC01104           | T | 0.0294 | 0.0052 | -0.0243 | 0.0165 | 0.1415 |
| Intelligence            | rs6746731  | 2  | ZNF638              | G | 0.0278 | 0.0051 | -0.0383 | 0.0156 | 0.0139 |
| Intelligence            | rs6779302  | 3  | DAZL/PLZL2          | G | 0.0343 | 0.0063 | 0.0054  | 0.0160 | 0.7341 |
| Intelligence            | rs7646501  | 3  | NR1D2/LINC00691     | A | 0.0378 | 0.0063 | -0.0471 | 0.0177 | 0.0079 |
| Intelligence            | rs41352752 | 5  | MEF2C               | C | 0.1012 | 0.0178 | -0.1040 | 0.0769 | 0.1762 |
| Intelligence            | rs1906252  | 6  | MIR2113             | A | 0.0334 | 0.0051 | -0.0230 | 0.0157 | 0.1439 |
| Intelligence            | rs2490272  | 6  | FOXO3               | T | 0.0389 | 0.0052 | 0.0405  | 0.0163 | 0.0131 |
| Intelligence            | rs10236197 | 7  | PDE1C               | T | 0.0338 | 0.0052 | -0.0255 | 0.0164 | 0.1193 |
| Intelligence            | rs4728302  | 7  | EXOC4               | C | 0.0308 | 0.0052 | -0.0346 | 0.0157 | 0.0272 |
| Intelligence            | rs11138902 | 9  | APBA1               | A | 0.0278 | 0.0051 | 0.0053  | 0.0157 | 0.7373 |
| Intelligence            | rs2251499  | 13 | LINC00343/LINC00460 | T | 0.0363 | 0.0058 | -0.0135 | 0.0178 | 0.4462 |
| Intelligence            | rs12928404 | 16 | ATXN2L              | T | 0.0293 | 0.0051 | 0.0212  | 0.0166 | 0.2023 |
| Intelligence            | rs16954078 | 17 | SKAP1               | T | 0.0375 | 0.0068 | -0.0105 | 0.0195 | 0.5896 |
| Intelligence            | rs36093924 | 22 | CYP2D7              | C | 0.0384 | 0.0061 | -0.0206 | 0.0166 | 0.2151 |
| Smoking quantity        | rs215605   | 7  | NA                  | G | 0.26   | 0.04   | 0.0202  | 0.0165 | 0.2222 |
| Smoking quantity        | rs13280604 | 8  | CHRN3/CHRNA6        | A | 0.31   | 0.05   | 0.0004  | 0.0184 | 0.9830 |
| Smoking quantity        | rs1051730  | 15 | CHRNA3/CHRNA5/CHRN4 | A | 0.80   | 0.05   | -0.0418 | 0.0163 | 0.0103 |
| Smoking quantity        | rs4105144  | 19 | CYP2A6/CYP2B6       | C | 0.39   | 0.06   | -0.0214 | 0.0348 | 0.5381 |
| Smoking initiation      | rs6265     | 11 | BDNF                | C | 0.0614 | 0.011  | -0.0215 | 0.0198 | 0.2780 |
| Smoking cessation       | rs3025343  | 9  | DBH                 | G | 0.1210 | 0.022  | 0.0174  | 0.0267 | 0.5134 |
| Alcohol                 | rs4665985  | 2  | GCKR                | C | 0.04   | 0.008  | 0.0003  | 0.0191 | 0.9877 |
| Alcohol                 | rs1229984  | 4  | ADH1B               | C | 0.19   | 0.015  | -0.0444 | 0.0424 | 0.2950 |
| Alcohol                 | rs7686419  | 4  | KLB                 | G | 0.03   | 0.008  | -0.0383 | 0.0158 | 0.0153 |
| Coffee                  | rs17685    | 7  | POR                 | A | 0.07   | 0.01   | -0.0253 | 0.0177 | 0.1515 |
| Coffee                  | rs4410790  | 7  | AHR                 | C | 0.10   | 0.01   | 0.0300  | 0.0166 | 0.0706 |
| Coffee                  | rs7800944  | 7  | MLXIPL              | C | 0.05   | 0.01   | 0.0292  | 0.0182 | 0.1087 |
| Coffee                  | rs2472297  | 15 | CYP1A2              | T | 0.14   | 0.01   | 0.0370  | 0.0196 | 0.0592 |
| Coffee                  | rs9902453  | 17 | EFCAB5              | G | 0.03   | 0.01   | 0.0257  | 0.0161 | 0.1110 |
| 25OHD                   | rs2282679  | 4  | GC                  | T | 8.45   | 0.31   | -0.0332 | 0.0179 | 0.0627 |
| 25OHD                   | rs10741657 | 11 | CYP2R1              | A | 3.12   | 0.29   | -0.0110 | 0.0160 | 0.4917 |
| 25OHD                   | rs12785878 | 11 | DHCR7               | T | 3.70   | 0.30   | -0.0223 | 0.0178 | 0.2082 |
| 25OHD                   | rs6013897  | 20 | CYP24A1             | T | 1.85   | 0.33   | -0.0212 | 0.0195 | 0.2773 |
| Serum folate            | rs1801133  | 1  | MTHFR               | G | 0.096  | NA     | -0.0067 | 0.0163 | 0.6817 |
| Serum folate            | rs652197   | 11 | FOLR3               | C | 0.069  | NA     | 0.0187  | 0.0287 | 0.5154 |
| Vitamin B <sub>12</sub> | rs2270655  | 4  | MMAA                | G | 0.066  | NA     | 0.0062  | 0.0353 | 0.8616 |
| Vitamin B <sub>12</sub> | rs1141321  | 6  | MUT                 | C | 0.061  | NA     | -0.0253 | 0.0183 | 0.1671 |
| Vitamin B <sub>12</sub> | rs1801222  | 10 | CUBN                | G | 0.110  | NA     | 0.0024  | 0.0167 | 0.8838 |
| Vitamin B <sub>12</sub> | rs34324219 | 11 | TCN1                | C | 0.210  | NA     | 0.0480  | 0.0361 | 0.1843 |
| Vitamin B <sub>12</sub> | rs3742801  | 14 | ABCD4               | T | 0.045  | NA     | 0.0102  | 0.0163 | 0.5333 |
| Vitamin B <sub>12</sub> | rs2336573  | 19 | CD320               | T | 0.320  | NA     | 0.0366  | 0.0469 | 0.4343 |
| Vitamin B <sub>12</sub> | rs1131603  | 22 | TCN2                | C | 0.190  | NA     | 0.0918  | 0.0574 | 0.1098 |
| Homocysteine            | rs12134663 | 1  | MTHFR               | C | 0.1010 | 0.011  | -0.0364 | 0.0208 | 0.0806 |
| Homocysteine            | rs1801133  | 1  | MTHFR               | A | 0.1583 | 0.007  | 0.0067  | 0.0163 | 0.6817 |
| Homocysteine            | rs2275565  | 1  | MTR                 | G | 0.0542 | 0.009  | -0.0066 | 0.0193 | 0.7336 |
| Homocysteine            | rs4660306  | 1  | MMACHC              | T | 0.0435 | 0.007  | -0.0218 | 0.0168 | 0.1951 |
| Homocysteine            | rs1047891  | 2  | CPS1                | A | 0.0864 | 0.008  | -0.0154 | 0.0195 | 0.4316 |
| Homocysteine            | rs548987   | 6  | SLC17A3             | C | 0.0597 | 0.010  | -0.0026 | 0.0243 | 0.9154 |

|                 |            |    |             |   |        |       |         |        |        |
|-----------------|------------|----|-------------|---|--------|-------|---------|--------|--------|
| Homocysteine    | rs9369898  | 6  | MUT         | A | 0.0449 | 0.007 | 0.0157  | 0.0157 | 0.3196 |
| Homocysteine    | rs42648    | 7  | GTPB10      | G | 0.0395 | 0.007 | -0.0062 | 0.0157 | 0.6929 |
| Homocysteine    | rs12780845 | 10 | CUBN        | A | 0.0529 | 0.009 | 0.0003  | 0.0165 | 0.9872 |
| Homocysteine    | rs1801222  | 10 | CUBN        | A | 0.0453 | 0.007 | -0.0024 | 0.0167 | 0.8838 |
| Homocysteine    | rs7130284  | 11 | NOX4        | C | 0.1242 | 0.013 | 0.0171  | 0.0303 | 0.5723 |
| Homocysteine    | rs957140   | 11 | NOX4        | G | 0.0450 | 0.008 | -0.0292 | 0.0156 | 0.0606 |
| Homocysteine    | rs2251468  | 12 | HNF1A       | C | 0.0512 | 0.007 | -0.0171 | 0.0164 | 0.2973 |
| Homocysteine    | rs12921383 | 16 | DPEP1/FANCA | C | 0.0900 | 0.014 | 0.0472  | 0.0306 | 0.1230 |
| Homocysteine    | rs154657   | 16 | DPEP1       | A | 0.0963 | 0.007 | 0.0178  | 0.0169 | 0.2919 |
| Homocysteine    | rs838133   | 19 | FUT2        | A | 0.0422 | 0.007 | 0.0261  | 0.0167 | 0.1188 |
| Homocysteine    | rs234709   | 21 | CBS         | C | 0.0718 | 0.007 | -0.0106 | 0.0158 | 0.5040 |
| Homocysteine    | rs2851391  | 21 | CBS         | T | 0.0560 | 0.008 | 0.0133  | 0.0160 | 0.4048 |
| Body mass index | rs11165643 | 1  | PTBP2       | T | 0.022  | 0.003 | 0.0109  | 0.0158 | 0.4886 |
| Body mass index | rs11583200 | 1  | ELAVL4      | C | 0.018  | 0.003 | 0.0162  | 0.0164 | 0.3239 |
| Body mass index | rs12401738 | 1  | FUBP1       | A | 0.021  | 0.003 | 0.0291  | 0.0166 | 0.0787 |
| Body mass index | rs12566985 | 1  | FPGT-TNNI3K | G | 0.024  | 0.003 | 0.0061  | 0.0155 | 0.6957 |
| Body mass index | rs17024393 | 1  | GNAT2       | C | 0.066  | 0.009 | -0.0168 | 0.0504 | 0.7384 |
| Body mass index | rs2820292  | 1  | NAV1        | C | 0.020  | 0.003 | 0.0143  | 0.0156 | 0.3611 |
| Body mass index | rs3101336  | 1  | NEGR1       | C | 0.033  | 0.003 | -0.0146 | 0.0166 | 0.3778 |
| Body mass index | rs543874   | 1  | SEC16B      | G | 0.048  | 0.004 | 0.0226  | 0.0205 | 0.2696 |
| Body mass index | rs657452   | 1  | AGBL4       | A | 0.023  | 0.003 | 0.0411  | 0.0164 | 0.0125 |
| Body mass index | rs10182181 | 2  | ADCY3       | G | 0.031  | 0.003 | 0.0069  | 0.0154 | 0.6548 |
| Body mass index | rs11125767 | 2  | LINC01122   | C | 0.023  | 0.003 | 0.0131  | 0.0173 | 0.4492 |
| Body mass index | rs11126666 | 2  | KCNK3       | A | 0.021  | 0.003 | 0.0183  | 0.0175 | 0.2954 |
| Body mass index | rs11688816 | 2  | EHBP1       | G | 0.017  | 0.003 | -0.0159 | 0.0153 | 0.3001 |
| Body mass index | rs13021737 | 2  | TMEM18      | G | 0.060  | 0.004 | -0.0352 | 0.0201 | 0.0791 |
| Body mass index | rs1528435  | 2  | UBE2E3      | T | 0.018  | 0.003 | 0.0081  | 0.0166 | 0.6258 |
| Body mass index | rs2121279  | 2  | LRP1B       | T | 0.025  | 0.004 | 0.0173  | 0.0235 | 0.4610 |
| Body mass index | rs7599312  | 2  | ERBB4       | G | 0.022  | 0.003 | -0.0358 | 0.0177 | 0.0434 |
| Body mass index | rs13078960 | 3  | CADM2       | G | 0.030  | 0.004 | -0.0259 | 0.0193 | 0.1792 |
| Body mass index | rs1516725  | 3  | ETV5        | C | 0.045  | 0.005 | 0.0308  | 0.0227 | 0.1761 |
| Body mass index | rs16851483 | 3  | RASA2       | T | 0.048  | 0.008 | 0.0249  | 0.0328 | 0.4489 |
| Body mass index | rs2365389  | 3  | FHIT        | C | 0.020  | 0.003 | -0.0015 | 0.0158 | 0.9224 |
| Body mass index | rs3849570  | 3  | GBE1        | A | 0.019  | 0.003 | 0.0319  | 0.0162 | 0.0489 |
| Body mass index | rs6804842  | 3  | RARB        | G | 0.019  | 0.003 | 0.0066  | 0.0158 | 0.6750 |
| Body mass index | rs10938397 | 4  | GNPDA2      | G | 0.040  | 0.003 | 0.0046  | 0.0160 | 0.7740 |
| Body mass index | rs11727676 | 4  | HHIP        | T | 0.036  | 0.006 | 0.0159  | 0.0419 | 0.7044 |
| Body mass index | rs13107325 | 4  | SLC39A8     | T | 0.048  | 0.007 | 0.0509  | 0.0308 | 0.0983 |
| Body mass index | rs17001654 | 4  | SCARB2      | G | 0.031  | 0.005 | -0.0018 | 0.0223 | 0.9342 |
| Body mass index | rs2112347  | 5  | POC5        | T | 0.026  | 0.003 | -0.0208 | 0.0210 | 0.3241 |
| Body mass index | rs13191362 | 6  | PARK2       | A | 0.028  | 0.005 | 0.0222  | 0.0237 | 0.3473 |
| Body mass index | rs2033529  | 6  | TDRG1       | G | 0.019  | 0.003 | -0.0103 | 0.0169 | 0.5434 |
| Body mass index | rs205262   | 6  | C6orf106    | G | 0.022  | 0.004 | 0.0069  | 0.0171 | 0.6883 |
| Body mass index | rs2207139  | 6  | TFAP2B      | G | 0.045  | 0.004 | -0.0001 | 0.0207 | 0.9946 |
| Body mass index | rs9400239  | 6  | FOXO3       | C | 0.019  | 0.003 | 0.0348  | 0.0169 | 0.0398 |
| Body mass index | rs1167827  | 7  | HIP1        | G | 0.020  | 0.003 | -0.0042 | 0.0159 | 0.7909 |
| Body mass index | rs7792906  | 7  | PMS2L11     | C | 0.032  | 0.006 | 0.0229  | 0.0344 | 0.5045 |
| Body mass index | rs17405819 | 8  | HNF4G       | T | 0.022  | 0.003 | -0.0018 | 0.0168 | 0.9162 |

|                 |            |    |             |   |        |        |         |        |                        |
|-----------------|------------|----|-------------|---|--------|--------|---------|--------|------------------------|
| Body mass index | rs2033732  | 8  | RALYL       | C | 0.019  | 0.004  | -0.0077 | 0.0189 | 0.6833                 |
| Body mass index | rs10733682 | 9  | LMX1B       | A | 0.017  | 0.003  | 0.0122  | 0.0154 | 0.4287                 |
| Body mass index | rs10968576 | 9  | LINGO2      | G | 0.025  | 0.003  | 0.0383  | 0.0165 | 0.0205                 |
| Body mass index | rs1928295  | 9  | TLR4        | T | 0.019  | 0.003  | -0.0162 | 0.0159 | 0.3077                 |
| Body mass index | rs4740619  | 9  | C9orf93     | T | 0.018  | 0.003  | 0.0131  | 0.0159 | 0.4082                 |
| Body mass index | rs6477694  | 9  | EPB41L4B    | C | 0.017  | 0.003  | 0.0207  | 0.0167 | 0.2159                 |
| Body mass index | rs11191560 | 10 | NT5C2       | C | 0.031  | 0.005  | -0.0232 | 0.0282 | 0.4101                 |
| Body mass index | rs17094222 | 10 | HIF1AN      | C | 0.025  | 0.004  | -0.0114 | 0.0193 | 0.5564                 |
| Body mass index | rs7899106  | 10 | GRID1       | G | 0.040  | 0.007  | 0.0256  | 0.0378 | 0.4975                 |
| Body mass index | rs7903146  | 10 | TCF7L2      | C | 0.023  | 0.003  | 0.0054  | 0.0173 | 0.7532                 |
| Body mass index | rs11030104 | 11 | BDNF        | A | 0.041  | 0.004  | -0.0185 | 0.0186 | 0.3202                 |
| Body mass index | rs12286929 | 11 | CADM1       | G | 0.022  | 0.003  | -0.0059 | 0.0154 | 0.7008                 |
| Body mass index | rs2176598  | 11 | HSD17B12    | T | 0.020  | 0.004  | 0.0079  | 0.0179 | 0.6599                 |
| Body mass index | rs3817334  | 11 | MTCH2       | T | 0.026  | 0.003  | -0.0616 | 0.0158 | 0.00009                |
| Body mass index | rs4256980  | 11 | TRIM66      | G | 0.021  | 0.003  | 0.0228  | 0.0166 | 0.1704                 |
| Body mass index | rs11057405 | 12 | CLIP1       | G | 0.031  | 0.006  | 0.0121  | 0.0286 | 0.6712                 |
| Body mass index | rs7138803  | 12 | BCDIN3D     | A | 0.032  | 0.003  | 0.0024  | 0.0164 | 0.8825                 |
| Body mass index | rs12429545 | 13 | OLFM4       | A | 0.033  | 0.005  | 0.0077  | 0.0237 | 0.7451                 |
| Body mass index | rs9581854  | 13 | MTIF3       | T | 0.030  | 0.005  | -0.0120 | 0.0205 | 0.5571                 |
| Body mass index | rs10132280 | 14 | STXBP6      | C | 0.023  | 0.003  | 0.0053  | 0.0173 | 0.7571                 |
| Body mass index | rs11847697 | 14 | PRKD1       | T | 0.049  | 0.008  | -0.0034 | 0.0400 | 0.9317                 |
| Body mass index | rs12885454 | 14 | PRKD1       | C | 0.021  | 0.003  | 0.0065  | 0.0164 | 0.6909                 |
| Body mass index | rs7141420  | 14 | NRXN3       | T | 0.024  | 0.003  | -0.0240 | 0.0158 | 0.1290                 |
| Body mass index | rs16951275 | 15 | MAP2K5      | T | 0.031  | 0.004  | 0.0145  | 0.0183 | 0.4283                 |
| Body mass index | rs3736485  | 15 | DMXL2       | A | 0.018  | 0.003  | 0.0148  | 0.0156 | 0.3421                 |
| Body mass index | rs12446632 | 16 | GPRC5B      | G | 0.040  | 0.005  | 0.0791  | 0.0227 | 0.0005                 |
| Body mass index | rs1558902  | 16 | FTO         | A | 0.082  | 0.003  | 0.0030  | 0.0160 | 0.8507                 |
| Body mass index | rs2650492  | 16 | SBK1        | A | 0.021  | 0.004  | -0.0153 | 0.0174 | 0.3773                 |
| Body mass index | rs3888190  | 16 | ATP2A1      | A | 0.031  | 0.003  | -0.0227 | 0.0162 | 0.1615                 |
| Body mass index | rs758747   | 16 | NLRC3       | T | 0.023  | 0.004  | 0.0196  | 0.0190 | 0.3017                 |
| Body mass index | rs9925964  | 16 | KAT8        | A | 0.019  | 0.003  | -0.0403 | 0.0158 | 0.0109                 |
| Body mass index | rs1000940  | 17 | RABEP1      | G | 0.019  | 0.003  | 0.0463  | 0.0168 | 0.0058                 |
| Body mass index | rs12940622 | 17 | RPTOR       | G | 0.018  | 0.003  | -0.0178 | 0.0154 | 0.2487                 |
| Body mass index | rs1808579  | 18 | C18orf8     | C | 0.017  | 0.003  | -0.0170 | 0.0160 | 0.2876                 |
| Body mass index | rs6567160  | 18 | MC4R        | C | 0.056  | 0.004  | -0.0354 | 0.0184 | 0.0544                 |
| Body mass index | rs7243357  | 18 | GRP         | T | 0.022  | 0.004  | 0.0109  | 0.0204 | 0.5957                 |
| Body mass index | rs17724992 | 19 | PGPEP1      | A | 0.019  | 0.004  | 0.0080  | 0.0177 | 0.6504                 |
| Body mass index | rs2075650  | 19 | TOMM40/APOE | A | 0.026  | 0.005  | -1.0415 | 0.0226 | 5.1×10 <sup>-464</sup> |
| Body mass index | rs2287019  | 19 | QPCTL       | C | 0.036  | 0.004  | -0.0134 | 0.0209 | 0.5209                 |
| Body mass index | rs29941    | 19 | KCTD15      | G | 0.018  | 0.003  | 0.0011  | 0.0165 | 0.9468                 |
| Body mass index | rs3810291  | 19 | ZC3H4       | A | 0.028  | 0.004  | -0.0197 | 0.0181 | 0.2768                 |
| WHRadjBMI       | rs10919388 | 1  | GORAB       | C | 0.0239 | 0.0040 | 0.0126  | 0.0172 | 0.4615                 |
| WHRadjBMI       | rs2645294  | 1  | TBX15-WARS2 | T | 0.0312 | 0.0035 | -0.0039 | 0.0161 | 0.8087                 |
| WHRadjBMI       | rs2820443  | 1  | LYPLAL1     | T | 0.0349 | 0.0037 | -0.0403 | 0.0178 | 0.0239                 |
| WHRadjBMI       | rs714515   | 1  | DNM3-PIGC   | G | 0.0270 | 0.0034 | 0.0020  | 0.0155 | 0.8963                 |
| WHRadjBMI       | rs905938   | 1  | DCST2       | T | 0.0249 | 0.0040 | -0.0003 | 0.0182 | 0.9887                 |
| WHRadjBMI       | rs10195252 | 2  | GRB14-COBL1 | T | 0.0270 | 0.0035 | 0.0265  | 0.0162 | 0.1020                 |
| WHRadjBMI       | rs1385167  | 2  | MEIS1       | G | 0.0293 | 0.0049 | -0.0473 | 0.0235 | 0.0443                 |

|                 |            |    |               |   |        |        |         |        |        |
|-----------------|------------|----|---------------|---|--------|--------|---------|--------|--------|
| WHRadjBMI       | rs1569135  | 2  | CALCL         | A | 0.0213 | 0.0034 | 0.0189  | 0.0153 | 0.2150 |
| WHRadjBMI       | rs10804591 | 3  | PLXND1        | A | 0.0245 | 0.0042 | 0.0493  | 0.0186 | 0.0081 |
| WHRadjBMI       | rs17451107 | 3  | LEKR1         | T | 0.0256 | 0.0036 | -0.0134 | 0.0161 | 0.4055 |
| WHRadjBMI       | rs17819328 | 3  | PPARG         | G | 0.0208 | 0.0035 | -0.0014 | 0.0164 | 0.9331 |
| WHRadjBMI       | rs2276824  | 3  | PBRM1         | C | 0.0236 | 0.0036 | 0.0066  | 0.0163 | 0.6853 |
| WHRadjBMI       | rs2371767  | 3  | ADAMTS9       | G | 0.0363 | 0.0039 | 0.0442  | 0.0173 | 0.0105 |
| WHRadjBMI       | rs303084   | 4  | SPATA5-FGF2   | A | 0.0232 | 0.0042 | -0.0129 | 0.0187 | 0.4923 |
| WHRadjBMI       | rs9991328  | 4  | FAM13A        | T | 0.0185 | 0.0034 | 0.0066  | 0.0158 | 0.6787 |
| WHRadjBMI       | rs6556301  | 5  | FGFR4         | T | 0.0221 | 0.0040 | 0.0103  | 0.0168 | 0.5396 |
| WHRadjBMI       | rs7705502  | 5  | CPEB4         | A | 0.0271 | 0.0036 | 0.0097  | 0.0170 | 0.5688 |
| WHRadjBMI       | rs1294410  | 6  | LY86          | C | 0.0309 | 0.0035 | -0.0068 | 0.0162 | 0.6730 |
| WHRadjBMI       | rs1358980  | 6  | VEGFA         | T | 0.0392 | 0.0036 | -0.0270 | 0.0168 | 0.1072 |
| WHRadjBMI       | rs1936805  | 6  | RSPO3         | T | 0.0425 | 0.0034 | 0.0091  | 0.0156 | 0.5586 |
| WHRadjBMI       | rs10245353 | 7  | NFE2L3        | A | 0.0348 | 0.0043 | -0.0092 | 0.0208 | 0.6594 |
| WHRadjBMI       | rs7801581  | 7  | HOXA11        | T | 0.0265 | 0.0042 | -0.0049 | 0.0191 | 0.7991 |
| WHRadjBMI       | rs12679556 | 8  | MSC           | G | 0.0268 | 0.0040 | -0.0079 | 0.0184 | 0.6663 |
| WHRadjBMI       | rs10991437 | 9  | ABCA1         | A | 0.0311 | 0.0054 | -0.0035 | 0.0244 | 0.8856 |
| WHRadjBMI       | rs11231693 | 11 | MACROD1-VEGFB | A | 0.0411 | 0.0075 | 0.0107  | 0.0341 | 0.7546 |
| WHRadjBMI       | rs10842707 | 12 | ITPR2-SSPN    | T | 0.0324 | 0.0040 | 0.0066  | 0.0187 | 0.7256 |
| WHRadjBMI       | rs1443512  | 12 | HOXC13        | A | 0.0283 | 0.0039 | 0.0383  | 0.0183 | 0.0361 |
| WHRadjBMI       | rs4765219  | 12 | CCDC92        | C | 0.0284 | 0.0036 | -0.0081 | 0.0167 | 0.6267 |
| WHRadjBMI       | rs1440372  | 15 | SMAD6         | C | 0.0244 | 0.0038 | 0.0085  | 0.0176 | 0.6275 |
| WHRadjBMI       | rs8030605  | 15 | RFX7          | A | 0.0304 | 0.0053 | 0.0181  | 0.0229 | 0.4302 |
| WHRadjBMI       | rs8042543  | 15 | KLF13         | C | 0.0263 | 0.0043 | 0.0034  | 0.0202 | 0.8671 |
| WHRadjBMI       | rs4646404  | 17 | PENT          | G | 0.0266 | 0.0039 | -0.004  | 0.0168 | 0.8095 |
| WHRadjBMI       | rs12608504 | 19 | JUND          | A | 0.0219 | 0.0036 | 0.0055  | 0.0160 | 0.7309 |
| WHRadjBMI       | rs4081724  | 19 | CEBPA         | G | 0.0347 | 0.0051 | 0.0272  | 0.0224 | 0.2247 |
| WHRadjBMI       | rs224333   | 20 | GDF5          | G | 0.0202 | 0.0036 | 0.0184  | 0.0168 | 0.2733 |
| WHRadjBMI       | rs6090583  | 20 | EYA2          | A | 0.0224 | 0.0034 | 0.0062  | 0.0155 | 0.6877 |
| WHRadjBMI       | rs979012   | 20 | BMP2          | T | 0.0273 | 0.0036 | 0.0497  | 0.0166 | 0.0028 |
| WHRadjBMI       | rs2294239  | 22 | ZNRF3-KREMEN1 | A | 0.0252 | 0.0035 | -0.0066 | 0.0155 | 0.6694 |
| Type 2 diabetes | rs10923931 | 1  | NOTCH2        | T | 0.077  | 0.019  | 0.0041  | 0.0251 | 0.8700 |
| Type 2 diabetes | rs2075423  | 1  | PROX1         | G | 0.068  | 0.012  | -0.0377 | 0.0167 | 0.0241 |
| Type 2 diabetes | rs10203174 | 2  | THADA         | C | 0.131  | 0.020  | 0.0671  | 0.0247 | 0.0067 |
| Type 2 diabetes | rs13389219 | 2  | GRB14         | C | 0.068  | 0.012  | 0.0271  | 0.0159 | 0.0887 |
| Type 2 diabetes | rs243088   | 2  | BCL11A        | T | 0.068  | 0.012  | -0.0008 | 0.0156 | 0.9598 |
| Type 2 diabetes | rs2943640  | 2  | IRS1          | C | 0.095  | 0.023  | 0.0086  | 0.0160 | 0.5896 |
| Type 2 diabetes | rs780094   | 2  | GCKR          | C | 0.058  | 0.012  | 0.0027  | 0.0161 | 0.8673 |
| Type 2 diabetes | rs11717195 | 3  | ADCY5         | T | 0.104  | 0.014  | 0.0313  | 0.0185 | 0.0905 |
| Type 2 diabetes | rs1496653  | 3  | UBE2E2        | A | 0.086  | 0.014  | -0.0041 | 0.0193 | 0.8327 |
| Type 2 diabetes | rs1801282  | 3  | PPARG         | C | 0.122  | 0.018  | 0.0281  | 0.0237 | 0.2367 |
| Type 2 diabetes | rs4402960  | 3  | IGF2BP2       | T | 0.122  | 0.014  | 0.0144  | 0.0171 | 0.3984 |
| Type 2 diabetes | rs6795735  | 3  | ADAMTS9       | C | 0.077  | 0.012  | 0.0176  | 0.0162 | 0.2759 |
| Type 2 diabetes | rs4458523  | 4  | WFS1          | G | 0.095  | 0.012  | 0.0268  | 0.0159 | 0.0916 |
| Type 2 diabetes | rs459193   | 5  | ANKRD55       | G | 0.077  | 0.014  | -0.0007 | 0.0185 | 0.9681 |
| Type 2 diabetes | rs7708285  | 5  | ZBED3         | G | 0.095  | 0.014  | 0.0067  | 0.0176 | 0.7056 |
| Type 2 diabetes | rs7756992  | 6  | CDKAL1        | G | 0.157  | 0.013  | -0.0078 | 0.0171 | 0.6504 |
| Type 2 diabetes | rs10278336 | 7  | GCK           | A | 0.068  | 0.014  | -0.0048 | 0.0162 | 0.7657 |

|                 |            |    |                |   |       |       |         |        |        |
|-----------------|------------|----|----------------|---|-------|-------|---------|--------|--------|
| Type 2 diabetes | rs13233731 | 7  | KLF14          | G | 0.049 | 0.012 | -0.0030 | 0.0164 | 0.8536 |
| Type 2 diabetes | rs17168486 | 7  | DGKB           | T | 0.104 | 0.016 | -0.0254 | 0.0215 | 0.2364 |
| Type 2 diabetes | rs849135   | 7  | JAZF1          | G | 0.104 | 0.012 | -0.0418 | 0.0155 | 0.0071 |
| Type 2 diabetes | rs3802177  | 8  | SLC30A8        | G | 0.131 | 0.013 | 0.0334  | 0.0171 | 0.0508 |
| Type 2 diabetes | rs516946   | 8  | ANK1           | C | 0.086 | 0.014 | -0.0122 | 0.0179 | 0.4957 |
| Type 2 diabetes | rs7845219  | 8  | TP53INP1       | T | 0.058 | 0.012 | -0.0485 | 0.0160 | 0.0024 |
| Type 2 diabetes | rs10811661 | 9  | CDKN2A/B       | T | 0.166 | 0.015 | -0.0059 | 0.0207 | 0.7759 |
| Type 2 diabetes | rs17791513 | 9  | TLE4           | A | 0.113 | 0.023 | 0.0034  | 0.0336 | 0.9189 |
| Type 2 diabetes | rs2796441  | 9  | TLE1           | G | 0.068 | 0.012 | -0.014  | 0.0170 | 0.4106 |
| Type 2 diabetes | rs1111875  | 10 | HHEX/IDE       | C | 0.104 | 0.014 | 0.0010  | 0.0167 | 0.9522 |
| Type 2 diabetes | rs11257655 | 10 | CDC123/CAMK1D  | T | 0.068 | 0.014 | 0.0041  | 0.0198 | 0.8356 |
| Type 2 diabetes | rs12571751 | 10 | ZMIZ1          | A | 0.077 | 0.012 | 0.0331  | 0.0160 | 0.0380 |
| Type 2 diabetes | rs7903146  | 10 | TCF7L2         | T | 0.329 | 0.013 | -0.0054 | 0.0173 | 0.7532 |
| Type 2 diabetes | rs10830963 | 11 | MTNR1B         | G | 0.095 | 0.014 | 0.0146  | 0.0193 | 0.4473 |
| Type 2 diabetes | rs1552224  | 11 | ARAP1 (CENTD2) | A | 0.104 | 0.016 | -0.005  | 0.0218 | 0.8171 |
| Type 2 diabetes | rs163184   | 11 | KCNQ1          | G | 0.086 | 0.012 | 0.0186  | 0.0159 | 0.2432 |
| Type 2 diabetes | rs2334499  | 11 | HCCA2          | T | 0.039 | 0.010 | 0.0268  | 0.0164 | 0.1015 |
| Type 2 diabetes | rs5215     | 11 | KCNJ11         | C | 0.068 | 0.012 | 0.0291  | 0.0165 | 0.0778 |
| Type 2 diabetes | rs10842994 | 12 | KLHDC5         | C | 0.095 | 0.016 | 0.0191  | 0.0206 | 0.3540 |
| Type 2 diabetes | rs11063069 | 12 | CCND2          | G | 0.077 | 0.014 | 0.0443  | 0.0271 | 0.1021 |
| Type 2 diabetes | rs12427353 | 12 | HNF1A (TCF1)   | G | 0.077 | 0.016 | 0.0032  | 0.0199 | 0.8711 |
| Type 2 diabetes | rs2261181  | 12 | HMG2A          | T | 0.122 | 0.020 | -0.0287 | 0.0258 | 0.2662 |
| Type 2 diabetes | rs7955901  | 12 | TSPAN8/LGR5    | C | 0.068 | 0.012 | -0.0140 | 0.0159 | 0.3785 |
| Type 2 diabetes | rs1359790  | 13 | SPRY2          | G | 0.077 | 0.012 | -0.0004 | 0.0178 | 0.9803 |
| Type 2 diabetes | rs11634397 | 15 | ZFAND6         | G | 0.049 | 0.012 | -0.0071 | 0.0178 | 0.6886 |
| Type 2 diabetes | rs12899811 | 15 | PRC1           | G | 0.077 | 0.012 | 0.0213  | 0.0165 | 0.1981 |
| Type 2 diabetes | rs7177055  | 15 | HMG20A         | A | 0.077 | 0.012 | -0.0129 | 0.0170 | 0.4458 |
| Type 2 diabetes | rs7202877  | 16 | BCAR1          | T | 0.113 | 0.021 | -0.0407 | 0.0270 | 0.1317 |
| Type 2 diabetes | rs9936385  | 16 | FTO            | C | 0.122 | 0.014 | 0.0057  | 0.0159 | 0.7177 |
| Type 2 diabetes | rs4430796  | 17 | HNF1B (TCF2)   | G | 0.122 | 0.027 | 0.0056  | 0.0169 | 0.7385 |
| Type 2 diabetes | rs12970134 | 18 | MC4R           | A | 0.077 | 0.014 | -0.0352 | 0.0175 | 0.0444 |
| Type 2 diabetes | rs10401969 | 19 | CILP2          | C | 0.122 | 0.020 | -0.0163 | 0.0346 | 0.6368 |
| Type 2 diabetes | rs8108269  | 19 | GIPR           | G | 0.068 | 0.014 | -0.0367 | 0.0176 | 0.0371 |
| Fasting glucose | rs340874   | 1  | PROX1          | C | 0.013 | 0.002 | -0.0372 | 0.0161 | 0.0213 |
| Fasting glucose | rs560887   | 2  | G6PC2          | C | 0.071 | 0.002 | 0.0232  | 0.0174 | 0.1822 |
| Fasting glucose | rs780094   | 2  | GCKR           | C | 0.027 | 0.002 | 0.0027  | 0.0161 | 0.8673 |
| Fasting glucose | rs11708067 | 3  | ADCY5          | A | 0.023 | 0.003 | 0.0354  | 0.0189 | 0.0613 |
| Fasting glucose | rs11715915 | 3  | AMT            | C | 0.012 | 0.002 | 0.0102  | 0.0175 | 0.5586 |
| Fasting glucose | rs11920090 | 3  | SLC2A2         | T | 0.026 | 0.003 | -0.0381 | 0.0224 | 0.0894 |
| Fasting glucose | rs7651090  | 3  | IGF2BP2        | G | 0.013 | 0.002 | 0.0150  | 0.0166 | 0.3653 |
| Fasting glucose | rs4869272  | 5  | PCSK1          | T | 0.018 | 0.002 | 0.0072  | 0.0171 | 0.6729 |
| Fasting glucose | rs7708285  | 5  | ZBED3          | G | 0.015 | 0.003 | 0.0067  | 0.0176 | 0.7056 |
| Fasting glucose | rs17762454 | 6  | RREB1          | T | 0.014 | 0.002 | 0.0034  | 0.0179 | 0.8499 |
| Fasting glucose | rs9368222  | 6  | CDKAL1         | A | 0.014 | 0.002 | -0.0155 | 0.0178 | 0.3857 |
| Fasting glucose | rs2191349  | 7  | DGKB/TMEM195   | T | 0.029 | 0.002 | 0.0186  | 0.0156 | 0.2339 |
| Fasting glucose | rs4607517  | 7  | GCK            | A | 0.057 | 0.003 | 0.0118  | 0.0202 | 0.5583 |
| Fasting glucose | rs6943153  | 7  | GRB10          | T | 0.015 | 0.002 | 0.0032  | 0.0173 | 0.8554 |
| Fasting glucose | rs11558471 | 8  | SLC30A8        | A | 0.029 | 0.002 | 0.0323  | 0.0171 | 0.0595 |

|                 |            |    |                 |   |       |       |         |        |                      |
|-----------------|------------|----|-----------------|---|-------|-------|---------|--------|----------------------|
| Fasting glucose | rs983309   | 8  | PPP1R3B         | T | 0.026 | 0.003 | 0.0237  | 0.0255 | 0.3539               |
| Fasting glucose | rs10811661 | 9  | CDKN2B          | T | 0.024 | 0.003 | -0.0059 | 0.0207 | 0.7759               |
| Fasting glucose | rs16913693 | 9  | IKBKAP          | T | 0.043 | 0.007 | -0.0487 | 0.0615 | 0.4280               |
| Fasting glucose | rs3829109  | 9  | LOC728489       | G | 0.017 | 0.003 | 0.0439  | 0.0199 | 0.0273               |
| Fasting glucose | rs7867224  | 9  | GLIS3           | A | 0.013 | 0.002 | 0.0137  | 0.0156 | 0.3784               |
| Fasting glucose | rs10885122 | 10 | ADRA2A          | G | 0.027 | 0.003 | 0.0059  | 0.0244 | 0.8100               |
| Fasting glucose | rs4506565  | 10 | TCF7L2          | T | 0.021 | 0.002 | -0.008  | 0.0166 | 0.6295               |
| Fasting glucose | rs10830963 | 11 | MTNR1B          | G | 0.078 | 0.002 | 0.0146  | 0.0193 | 0.4473               |
| Fasting glucose | rs11603334 | 11 | ARAP1           | G | 0.019 | 0.003 | -0.0008 | 0.0221 | 0.9725               |
| Fasting glucose | rs11605924 | 11 | CRY2            | A | 0.020 | 0.002 | 0.0428  | 0.0156 | 0.0060               |
| Fasting glucose | rs174550   | 11 | FADS1           | T | 0.019 | 0.002 | 0.0124  | 0.0163 | 0.4451               |
| Fasting glucose | rs7944584  | 11 | MADD            | A | 0.023 | 0.002 | -0.0796 | 0.0171 | 3.0×10 <sup>-6</sup> |
| Fasting glucose | rs10747083 | 12 | P2RX2           | A | 0.013 | 0.002 | 0.0317  | 0.0207 | 0.1260               |
| Fasting glucose | rs2657879  | 12 | GLS2            | G | 0.016 | 0.003 | 0.0467  | 0.0207 | 0.0242               |
| Fasting glucose | rs11619319 | 13 | PDX1            | G | 0.019 | 0.002 | -0.0149 | 0.0191 | 0.4356               |
| Fasting glucose | rs576674   | 13 | KL              | G | 0.017 | 0.003 | 0.0123  | 0.0208 | 0.5542               |
| Fasting glucose | rs3783347  | 14 | WARS            | G | 0.017 | 0.003 | -0.0125 | 0.0188 | 0.5057               |
| Fasting glucose | rs11071657 | 15 | VPS13C/C2CD4A/B | A | 0.010 | 0.002 | -0.0104 | 0.0165 | 0.5286               |
| Fasting glucose | rs2302593  | 19 | GIPR            | C | 0.014 | 0.002 | -0.0582 | 0.0164 | 0.0004               |
| Fasting glucose | rs6072275  | 20 | TOP1            | A | 0.016 | 0.003 | 0.0184  | 0.0216 | 0.3931               |
| Fasting glucose | rs6113722  | 20 | FOXA2           | G | 0.035 | 0.005 | 0.0189  | 0.0387 | 0.6256               |
| Fasting insulin | rs4846565  | 1  | LYPLAL1         | G | 0.013 | 0.002 | -0.0259 | 0.0166 | 0.1186               |
| Fasting insulin | rs10195252 | 2  | GRB14           | T | 0.016 | 0.003 | 0.0265  | 0.0162 | 0.1020               |
| Fasting insulin | rs1530559  | 2  | YSK4            | A | 0.015 | 0.003 | -0.0357 | 0.0191 | 0.0618               |
| Fasting insulin | rs2943645  | 2  | IRS1            | T | 0.019 | 0.002 | 0.0106  | 0.0164 | 0.5199               |
| Fasting insulin | rs780094   | 2  | GCKR            | C | 0.019 | 0.002 | 0.0027  | 0.0161 | 0.8673               |
| Fasting insulin | rs17036328 | 3  | PPARG           | T | 0.021 | 0.003 | 0.0280  | 0.0244 | 0.2512               |
| Fasting insulin | rs3822072  | 4  | FAM13A1         | A | 0.012 | 0.002 | 0.0096  | 0.0157 | 0.5413               |
| Fasting insulin | rs6822892  | 4  | PDGFC           | A | 0.014 | 0.002 | -0.0086 | 0.0162 | 0.5981               |
| Fasting insulin | rs974801   | 4  | TET2            | G | 0.014 | 0.002 | 0.0141  | 0.0158 | 0.3716               |
| Fasting insulin | rs459193   | 5  | ANKRD55         | G | 0.015 | 0.002 | -0.0007 | 0.0185 | 0.9681               |
| Fasting insulin | rs4865796  | 5  | ARL15           | A | 0.015 | 0.003 | 0.0123  | 0.0167 | 0.4635               |
| Fasting insulin | rs2745353  | 6  | RSPO3           | T | 0.014 | 0.002 | 0.0089  | 0.0156 | 0.5681               |
| Fasting insulin | rs6912327  | 6  | C6orf107        | T | 0.017 | 0.003 | -0.0059 | 0.0193 | 0.7618               |
| Fasting insulin | rs1167800  | 7  | HIP1            | A | 0.016 | 0.003 | -0.009  | 0.0163 | 0.5802               |
| Fasting insulin | rs2126259  | 8  | PPP1R3B         | T | 0.024 | 0.003 | 0.0054  | 0.0273 | 0.8446               |
| Fasting insulin | rs7903146  | 10 | TCF7L2          | C | 0.018 | 0.003 | 0.0054  | 0.0173 | 0.7532               |
| Fasting insulin | rs860598   | 12 | IGF1            | A | 0.018 | 0.003 | 0.0111  | 0.0207 | 0.5941               |
| Fasting insulin | rs1421085  | 16 | FTO             | C | 0.020 | 0.003 | -0.0005 | 0.0163 | 0.9763               |
| Fasting insulin | rs731839   | 19 | PEPD            | G | 0.015 | 0.003 | 0.0102  | 0.0168 | 0.5428               |
| Systolic BP     | rs2404715  | 1  | NA              | C | 0.400 | NA    | 0.0065  | 0.0269 | 0.8095               |
| Systolic BP     | rs60199046 | 1  | NA              | A | 0.240 | NA    | -0.0083 | 0.0174 | 0.6346               |
| Systolic BP     | rs6664664  | 1  | NA              | G | 0.257 | NA    | -0.0146 | 0.0154 | 0.3446               |
| Systolic BP     | rs783621   | 1  | NA              | A | 0.289 | NA    | -0.0141 | 0.0160 | 0.3778               |
| Systolic BP     | rs786919   | 1  | NA              | A | 0.262 | NA    | -0.0143 | 0.0156 | 0.3580               |
| Systolic BP     | rs1063281  | 2  | NA              | C | 0.247 | NA    | -0.0275 | 0.0170 | 0.1044               |
| Systolic BP     | rs1250247  | 2  | NA              | C | 0.310 | NA    | -0.0089 | 0.0188 | 0.6369               |
| Systolic BP     | rs13024657 | 2  | NA              | T | 0.296 | NA    | 0.0132  | 0.0218 | 0.5432               |

|             |             |    |    |   |       |    |         |        |        |
|-------------|-------------|----|----|---|-------|----|---------|--------|--------|
| Systolic BP | rs13403122  | 2  | NA | C | 0.250 | NA | 0.0011  | 0.0175 | 0.9490 |
| Systolic BP | rs13420463  | 2  | NA | A | 0.282 | NA | -0.0296 | 0.0187 | 0.1130 |
| Systolic BP | rs2360970   | 2  | NA | C | 0.215 | NA | -0.0005 | 0.0155 | 0.9723 |
| Systolic BP | rs3731818   | 2  | NA | G | 0.240 | NA | 0.0177  | 0.0167 | 0.2872 |
| Systolic BP | rs6434404   | 2  | NA | A | 0.311 | NA | 0.0143  | 0.0168 | 0.3936 |
| Systolic BP | rs7590201   | 2  | NA | T | 0.216 | NA | -0.0064 | 0.0156 | 0.6830 |
| Systolic BP | rs113161639 | 3  | NA | G | 0.451 | NA | 0.0141  | 0.0261 | 0.5888 |
| Systolic BP | rs12630213  | 3  | NA | C | 0.276 | NA | 0.0233  | 0.0166 | 0.1615 |
| Systolic BP | rs12636552  | 3  | NA | A | 0.241 | NA | -0.007  | 0.0167 | 0.6734 |
| Systolic BP | rs2178452   | 3  | NA | G | 0.259 | NA | -0.0395 | 0.0166 | 0.0173 |
| Systolic BP | rs4141663   | 3  | NA | C | 0.258 | NA | 0.0254  | 0.0160 | 0.1138 |
| Systolic BP | rs6803322   | 3  | NA | C | 0.228 | NA | 0.0244  | 0.0167 | 0.1444 |
| Systolic BP | rs75305034  | 3  | NA | T | 0.331 | NA | 0.0142  | 0.0166 | 0.3926 |
| Systolic BP | rs9844972   | 3  | NA | C | 0.441 | NA | -0.072  | 0.0321 | 0.0248 |
| Systolic BP | rs12504699  | 4  | NA | G | 0.221 | NA | -0.0431 | 0.0161 | 0.0074 |
| Systolic BP | rs13104866  | 4  | NA | G | 0.278 | NA | 0.0077  | 0.0156 | 0.6203 |
| Systolic BP | rs13112725  | 4  | NA | C | 0.297 | NA | -0.0137 | 0.0186 | 0.4601 |
| Systolic BP | rs1878406   | 4  | NA | T | 0.321 | NA | -0.0444 | 0.0228 | 0.0514 |
| Systolic BP | rs4292285   | 4  | NA | T | 0.230 | NA | -0.0142 | 0.0157 | 0.3641 |
| Systolic BP | rs55940751  | 4  | NA | C | 0.216 | NA | 0.0204  | 0.0156 | 0.1900 |
| Systolic BP | rs66887589  | 4  | NA | C | 0.214 | NA | 0.0024  | 0.0156 | 0.8762 |
| Systolic BP | rs7665304   | 4  | NA | A | 0.220 | NA | -0.0061 | 0.0158 | 0.6980 |
| Systolic BP | rs17286052  | 5  | NA | A | 0.360 | NA | 0.0431  | 0.0215 | 0.0454 |
| Systolic BP | rs303343    | 5  | NA | T | 0.229 | NA | -0.012  | 0.0157 | 0.4426 |
| Systolic BP | rs4475250   | 5  | NA | G | 0.243 | NA | -0.0334 | 0.0159 | 0.0355 |
| Systolic BP | rs6595838   | 5  | NA | A | 0.267 | NA | 0.0042  | 0.0170 | 0.8031 |
| Systolic BP | rs2050663   | 6  | NA | C | 0.229 | NA | 0.0239  | 0.0160 | 0.1345 |
| Systolic BP | rs35410524  | 6  | NA | T | 0.305 | NA | -0.0259 | 0.0195 | 0.1839 |
| Systolic BP | rs4712656   | 6  | NA | C | 0.227 | NA | 0.0284  | 0.0156 | 0.0697 |
| Systolic BP | rs12670854  | 7  | NA | A | 0.360 | NA | 0.0319  | 0.0247 | 0.1970 |
| Systolic BP | rs17423264  | 7  | NA | C | 0.366 | NA | 0.0116  | 0.0293 | 0.6921 |
| Systolic BP | rs6957161   | 7  | NA | A | 0.256 | NA | 0.0216  | 0.0178 | 0.2250 |
| Systolic BP | rs112875651 | 8  | NA | G | 0.226 | NA | 0.0153  | 0.0169 | 0.3656 |
| Systolic BP | rs11993898  | 8  | NA | C | 0.326 | NA | 0.0083  | 0.0200 | 0.6781 |
| Systolic BP | rs1569209   | 8  | NA | T | 0.404 | NA | -0.0004 | 0.0273 | 0.9869 |
| Systolic BP | rs7008914   | 8  | NA | T | 0.238 | NA | 0.0201  | 0.0190 | 0.2913 |
| Systolic BP | rs76735299  | 8  | NA | A | 0.429 | NA | -0.0257 | 0.0297 | 0.3857 |
| Systolic BP | rs9773022   | 8  | NA | C | 0.244 | NA | -0.0028 | 0.0171 | 0.8678 |
| Systolic BP | rs10818775  | 9  | NA | C | 0.332 | NA | 0.0059  | 0.0242 | 0.8089 |
| Systolic BP | rs28663144  | 9  | NA | C | 0.694 | NA | 0.0431  | 0.0419 | 0.3031 |
| Systolic BP | rs7041664   | 9  | NA | A | 0.247 | NA | 0.0463  | 0.0190 | 0.0151 |
| Systolic BP | rs1848797   | 10 | NA | A | 0.265 | NA | -0.0212 | 0.0157 | 0.1768 |
| Systolic BP | rs34872471  | 10 | NA | C | 0.250 | NA | -0.0090 | 0.0169 | 0.5964 |
| Systolic BP | rs4551692   | 10 | NA | A | 0.419 | NA | -0.0261 | 0.0256 | 0.3079 |
| Systolic BP | rs9888067   | 10 | NA | G | 0.282 | NA | 0.0045  | 0.0201 | 0.8215 |
| Systolic BP | rs1245113   | 11 | NA | G | 0.355 | NA | 0.0010  | 0.0156 | 0.9491 |
| Systolic BP | rs1938598   | 11 | NA | T | 0.330 | NA | -0.0331 | 0.0182 | 0.0691 |
| Systolic BP | rs2289125   | 11 | NA | C | 0.274 | NA | -0.0184 | 0.0204 | 0.3678 |

|              |            |    |    |   |       |    |         |        |                      |
|--------------|------------|----|----|---|-------|----|---------|--------|----------------------|
| Systolic BP  | rs2585810  | 11 | NA | A | 0.220 | NA | 0.0083  | 0.0161 | 0.6050               |
| Systolic BP  | rs360158   | 11 | NA | A | 0.301 | NA | -0.0234 | 0.0162 | 0.1489               |
| Systolic BP  | rs61448762 | 11 | NA | G | 0.358 | NA | -0.0400 | 0.0267 | 0.1339               |
| Systolic BP  | rs685149   | 11 | NA | G | 0.311 | NA | -0.0118 | 0.0164 | 0.4728               |
| Systolic BP  | rs7107356  | 11 | NA | G | 0.309 | NA | 0.0695  | 0.0156 | 8.4×10 <sup>-6</sup> |
| Systolic BP  | rs74237369 | 11 | NA | G | 0.315 | NA | -0.0304 | 0.0252 | 0.2276               |
| Systolic BP  | rs7927515  | 11 | NA | A | 0.235 | NA | -0.0018 | 0.0163 | 0.9118               |
| Systolic BP  | rs7951348  | 11 | NA | T | 0.252 | NA | -0.0238 | 0.0160 | 0.1382               |
| Systolic BP  | rs10747570 | 12 | NA | A | 0.256 | NA | -0.0021 | 0.0164 | 0.9000               |
| Systolic BP  | rs10784502 | 12 | NA | T | 0.235 | NA | 0.0249  | 0.0157 | 0.1128               |
| Systolic BP  | rs11168244 | 12 | NA | C | 0.318 | NA | 0.0041  | 0.0196 | 0.8326               |
| Systolic BP  | rs17210898 | 12 | NA | G | 0.556 | NA | 0.0217  | 0.0423 | 0.6083               |
| Systolic BP  | rs7977389  | 12 | NA | T | 0.381 | NA | 0.0001  | 0.0275 | 0.9964               |
| Systolic BP  | rs63418562 | 13 | NA | C | 0.312 | NA | -0.0064 | 0.0183 | 0.7276               |
| Systolic BP  | rs9314907  | 13 | NA | T | 0.292 | NA | -0.0007 | 0.0199 | 0.9722               |
| Systolic BP  | rs9565436  | 13 | NA | C | 0.303 | NA | 0.0421  | 0.0229 | 0.0665               |
| Systolic BP  | rs7161323  | 14 | NA | T | 0.275 | NA | -0.0323 | 0.0174 | 0.0627               |
| Systolic BP  | rs8904     | 14 | NA | A | 0.259 | NA | 0.0097  | 0.0162 | 0.5502               |
| Systolic BP  | rs2759308  | 15 | NA | A | 0.276 | NA | 0.0307  | 0.0156 | 0.0498               |
| Systolic BP  | rs937213   | 15 | NA | T | 0.256 | NA | -0.0154 | 0.0163 | 0.3450               |
| Systolic BP  | rs12596053 | 16 | NA | C | 0.275 | NA | 0.0440  | 0.0160 | 0.0060               |
| Systolic BP  | rs200541   | 16 | NA | G | 0.281 | NA | -0.0287 | 0.0194 | 0.1389               |
| Systolic BP  | rs35261357 | 16 | NA | T | 0.265 | NA | -0.0217 | 0.0158 | 0.1685               |
| Systolic BP  | rs9934772  | 16 | NA | T | 0.373 | NA | -0.0075 | 0.0155 | 0.6272               |
| Systolic BP  | rs9935770  | 16 | NA | C | 0.223 | NA | -0.0449 | 0.0160 | 0.0051               |
| Systolic BP  | rs4295     | 17 | NA | C | 0.240 | NA | -0.0469 | 0.0162 | 0.0039               |
| Systolic BP  | rs4788913  | 17 | NA | A | 0.283 | NA | 0.0157  | 0.0166 | 0.3420               |
| Systolic BP  | rs7225219  | 17 | NA | A | 0.248 | NA | 0.0090  | 0.0174 | 0.6028               |
| Systolic BP  | rs8073626  | 17 | NA | C | 0.217 | NA | 0.0137  | 0.0156 | 0.3793               |
| Systolic BP  | rs12606620 | 18 | NA | G | 0.292 | NA | 0.0258  | 0.0169 | 0.1275               |
| Systolic BP  | rs2193635  | 18 | NA | T | 0.274 | NA | -0.0135 | 0.0204 | 0.5095               |
| Systolic BP  | rs8105753  | 19 | NA | A | 0.249 | NA | 0.0165  | 0.0167 | 0.3218               |
| Systolic BP  | rs6031435  | 20 | NA | G | 0.214 | NA | 0.0218  | 0.0159 | 0.1702               |
| Systolic BP  | rs6090040  | 20 | NA | A | 0.265 | NA | -0.0102 | 0.0187 | 0.5841               |
| Systolic BP  | rs6129880  | 20 | NA | T | 0.264 | NA | -0.0308 | 0.0204 | 0.1323               |
| Systolic BP  | rs13050325 | 21 | NA | G | 0.258 | NA | -0.0296 | 0.0181 | 0.1011               |
| Systolic BP  | rs34887403 | 22 | NA | A | 0.304 | NA | -0.0292 | 0.0228 | 0.2001               |
| Diastolic BP | rs11102916 | 1  | NA | A | 0.575 | NA | 0.0938  | 0.0601 | 0.1187               |
| Diastolic BP | rs11809042 | 1  | NA | G | 0.249 | NA | 0.0280  | 0.0168 | 0.0956               |
| Diastolic BP | rs12405515 | 1  | NA | G | 0.170 | NA | 0.0016  | 0.0227 | 0.9439               |
| Diastolic BP | rs17046596 | 1  | NA | C | 0.151 | NA | -0.0345 | 0.0179 | 0.0544               |
| Diastolic BP | rs4653889  | 1  | NA | A | 0.152 | NA | 0.0140  | 0.0160 | 0.3790               |
| Diastolic BP | rs6428947  | 1  | NA | C | 0.205 | NA | -0.0385 | 0.0216 | 0.0743               |
| Diastolic BP | rs6664664  | 1  | NA | G | 0.147 | NA | -0.0146 | 0.0154 | 0.3446               |
| Diastolic BP | rs10198275 | 2  | NA | A | 0.135 | NA | -0.0056 | 0.0158 | 0.7238               |
| Diastolic BP | rs1063281  | 2  | NA | C | 0.170 | NA | -0.0275 | 0.0170 | 0.1044               |
| Diastolic BP | rs13403122 | 2  | NA | C | 0.195 | NA | 0.0011  | 0.0175 | 0.9490               |
| Diastolic BP | rs1867863  | 2  | NA | G | 0.143 | NA | -0.0062 | 0.0170 | 0.7146               |



|              |             |   |    |   |       |    |         |        |        |
|--------------|-------------|---|----|---|-------|----|---------|--------|--------|
| Diastolic BP | rs1876487   | 2 | NA | C | 0.162 | NA | -0.0229 | 0.0187 | 0.2202 |
| Diastolic BP | rs3923097   | 2 | NA | T | 0.273 | NA | -0.008  | 0.0324 | 0.8051 |
| Diastolic BP | rs58117425  | 2 | NA | A | 0.192 | NA | 0.0109  | 0.0186 | 0.5583 |
| Diastolic BP | rs7590201   | 2 | NA | T | 0.138 | NA | -0.0064 | 0.0156 | 0.6830 |
| Diastolic BP | rs1053711   | 3 | NA | G | 0.153 | NA | -0.0263 | 0.0168 | 0.1179 |
| Diastolic BP | rs113161639 | 3 | NA | G | 0.288 | NA | 0.0141  | 0.0261 | 0.5888 |
| Diastolic BP | rs12630213  | 3 | NA | C | 0.153 | NA | 0.0233  | 0.0166 | 0.1615 |
| Diastolic BP | rs2236973   | 3 | NA | C | 0.182 | NA | 0.0092  | 0.0236 | 0.6964 |
| Diastolic BP | rs3749237   | 3 | NA | A | 0.165 | NA | -0.0012 | 0.0166 | 0.9413 |
| Diastolic BP | rs4686683   | 3 | NA | G | 0.172 | NA | 0.0149  | 0.0168 | 0.3758 |
| Diastolic BP | rs6795735   | 3 | NA | C | 0.159 | NA | 0.0176  | 0.0162 | 0.2759 |
| Diastolic BP | rs75305034  | 3 | NA | T | 0.256 | NA | 0.0142  | 0.0166 | 0.3926 |
| Diastolic BP | rs76398786  | 3 | NA | T | 0.382 | NA | 0.0591  | 0.0765 | 0.4401 |
| Diastolic BP | rs9845655   | 3 | NA | T | 0.161 | NA | -0.0461 | 0.0177 | 0.0092 |
| Diastolic BP | rs9864898   | 3 | NA | T | 0.190 | NA | -0.0169 | 0.0214 | 0.4291 |
| Diastolic BP | rs9882772   | 3 | NA | C | 0.133 | NA | 0.0043  | 0.0157 | 0.7850 |
| Diastolic BP | rs13112725  | 4 | NA | C | 0.150 | NA | -0.0137 | 0.0186 | 0.4601 |
| Diastolic BP | rs4292285   | 4 | NA | T | 0.154 | NA | -0.0142 | 0.0157 | 0.3641 |
| Diastolic BP | rs66887589  | 4 | NA | C | 0.206 | NA | 0.0024  | 0.0156 | 0.8762 |
| Diastolic BP | rs111304266 | 5 | NA | G | 0.370 | NA | 0.0531  | 0.0542 | 0.3273 |
| Diastolic BP | rs168643    | 5 | NA | T | 0.139 | NA | -0.0113 | 0.0165 | 0.4922 |
| Diastolic BP | rs17082391  | 5 | NA | C | 0.375 | NA | -0.1065 | 0.0473 | 0.0243 |
| Diastolic BP | rs17286052  | 5 | NA | A | 0.188 | NA | 0.0431  | 0.0215 | 0.0454 |
| Diastolic BP | rs258494    | 5 | NA | C | 0.216 | NA | 0.0245  | 0.0170 | 0.1494 |
| Diastolic BP | rs4475250   | 5 | NA | G | 0.136 | NA | -0.0334 | 0.0159 | 0.0355 |
| Diastolic BP | rs7734334   | 5 | NA | A | 0.154 | NA | -0.0015 | 0.0166 | 0.9285 |
| Diastolic BP | rs13205180  | 6 | NA | T | 0.143 | NA | -0.0164 | 0.0156 | 0.2917 |
| Diastolic BP | rs13210963  | 6 | NA | C | 0.239 | NA | -0.0027 | 0.0183 | 0.8814 |
| Diastolic BP | rs1544935   | 6 | NA | T | 0.176 | NA | -0.0179 | 0.0193 | 0.3543 |
| Diastolic BP | rs1630266   | 6 | NA | A | 0.252 | NA | -0.0262 | 0.0280 | 0.3494 |
| Diastolic BP | rs169287    | 6 | NA | C | 0.215 | NA | -0.0034 | 0.0224 | 0.8808 |
| Diastolic BP | rs1761870   | 6 | NA | G | 0.175 | NA | 0.0008  | 0.0205 | 0.9707 |
| Diastolic BP | rs2050663   | 6 | NA | C | 0.174 | NA | 0.0239  | 0.0160 | 0.1345 |
| Diastolic BP | rs210156    | 6 | NA | G | 0.148 | NA | -0.0214 | 0.0168 | 0.2015 |
| Diastolic BP | rs36061333  | 6 | NA | C | 0.160 | NA | -0.0173 | 0.0187 | 0.3554 |
| Diastolic BP | rs4709746   | 6 | NA | C | 0.190 | NA | -0.0126 | 0.0243 | 0.6033 |
| Diastolic BP | rs903432    | 6 | NA | A | 0.313 | NA | 0.0300  | 0.0322 | 0.3516 |
| Diastolic BP | rs1015538   | 7 | NA | A | 0.137 | NA | -0.0544 | 0.0165 | 0.0010 |
| Diastolic BP | rs111630016 | 7 | NA | C | 0.324 | NA | -0.0632 | 0.0472 | 0.1809 |
| Diastolic BP | rs11486794  | 7 | NA | C | 0.219 | NA | -0.0005 | 0.0231 | 0.9814 |
| Diastolic BP | rs11556924  | 7 | NA | C | 0.181 | NA | 0.0129  | 0.0176 | 0.4640 |
| Diastolic BP | rs34594435  | 7 | NA | C | 0.183 | NA | -0.0196 | 0.0203 | 0.3346 |
| Diastolic BP | rs6957161   | 7 | NA | A | 0.157 | NA | 0.0216  | 0.0178 | 0.2250 |
| Diastolic BP | rs76627715  | 7 | NA | T | 0.216 | NA | 0.0123  | 0.0240 | 0.6075 |
| Diastolic BP | rs10103353  | 8 | NA | C | 0.147 | NA | 0.0035  | 0.0162 | 0.8272 |
| Diastolic BP | rs2280861   | 8 | NA | G | 0.173 | NA | 0.0228  | 0.0181 | 0.2064 |
| Diastolic BP | rs9773022   | 8 | NA | C | 0.147 | NA | -0.0028 | 0.0171 | 0.8678 |
| Diastolic BP | rs507666    | 9 | NA | G | 0.169 | NA | 0.0022  | 0.0194 | 0.9095 |

|                   |             |    |           |   |       |    |         |        |                      |
|-------------------|-------------|----|-----------|---|-------|----|---------|--------|----------------------|
| Diastolic BP      | rs10751962  | 10 | NA        | T | 0.219 | NA | -0.0300 | 0.0265 | 0.2579               |
| Diastolic BP      | rs17617337  | 10 | NA        | C | 0.172 | NA | -0.0166 | 0.0191 | 0.3842               |
| Diastolic BP      | rs1848797   | 10 | NA        | A | 0.191 | NA | -0.0212 | 0.0157 | 0.1768               |
| Diastolic BP      | rs2246438   | 10 | NA        | G | 0.160 | NA | 0.0111  | 0.0172 | 0.5182               |
| Diastolic BP      | rs4551692   | 10 | NA        | A | 0.255 | NA | -0.0261 | 0.0256 | 0.3079               |
| Diastolic BP      | rs6479908   | 10 | NA        | G | 0.142 | NA | 0.0036  | 0.0155 | 0.8160               |
| Diastolic BP      | rs11021221  | 11 | NA        | T | 0.213 | NA | -0.0045 | 0.0222 | 0.8391               |
| Diastolic BP      | rs11030119  | 11 | NA        | G | 0.180 | NA | -0.0225 | 0.0176 | 0.2014               |
| Diastolic BP      | rs12787709  | 11 | NA        | A | 0.138 | NA | 0.0211  | 0.0171 | 0.2167               |
| Diastolic BP      | rs360158    | 11 | NA        | A | 0.165 | NA | -0.0234 | 0.0162 | 0.1489               |
| Diastolic BP      | rs628224    | 11 | NA        | A | 0.198 | NA | -0.013  | 0.0227 | 0.5675               |
| Diastolic BP      | rs7107356   | 11 | NA        | G | 0.149 | NA | 0.0695  | 0.0156 | 8.4×10 <sup>-6</sup> |
| Diastolic BP      | rs7116797   | 11 | NA        | A | 0.214 | NA | 0.0463  | 0.0260 | 0.0752               |
| Diastolic BP      | rs72930293  | 11 | NA        | C | 0.234 | NA | 0.0440  | 0.0253 | 0.0817               |
| Diastolic BP      | rs7928655   | 11 | NA        | G | 0.143 | NA | 0.0227  | 0.0170 | 0.1808               |
| Diastolic BP      | rs10747570  | 12 | NA        | A | 0.184 | NA | -0.0021 | 0.0164 | 0.9000               |
| Diastolic BP      | rs11168244  | 12 | NA        | C | 0.165 | NA | 0.0041  | 0.0196 | 0.8326               |
| Diastolic BP      | rs1152958   | 12 | NA        | G | 0.138 | NA | -0.0121 | 0.0167 | 0.4680               |
| Diastolic BP      | rs17210898  | 12 | NA        | G | 0.351 | NA | 0.0217  | 0.0423 | 0.6083               |
| Diastolic BP      | rs7980687   | 12 | NA        | G | 0.196 | NA | 0.0357  | 0.0196 | 0.0682               |
| Diastolic BP      | rs3934941   | 13 | NA        | A | 0.163 | NA | -0.0062 | 0.0181 | 0.7325               |
| Diastolic BP      | rs63418562  | 13 | NA        | C | 0.240 | NA | -0.0064 | 0.0183 | 0.7276               |
| Diastolic BP      | rs36226649  | 14 | NA        | C | 0.297 | NA | 0.0292  | 0.0359 | 0.4158               |
| Diastolic BP      | rs7161323   | 14 | NA        | T | 0.147 | NA | -0.0323 | 0.0174 | 0.0627               |
| Diastolic BP      | rs11631778  | 15 | NA        | A | 0.141 | NA | -0.001  | 0.0162 | 0.9506               |
| Diastolic BP      | rs12906962  | 15 | NA        | C | 0.160 | NA | 0.0065  | 0.0173 | 0.7080               |
| Diastolic BP      | rs2034618   | 15 | NA        | C | 0.188 | NA | 0.0112  | 0.0185 | 0.5452               |
| Diastolic BP      | rs2759308   | 15 | NA        | A | 0.136 | NA | 0.0307  | 0.0156 | 0.0498               |
| Diastolic BP      | rs35654783  | 15 | NA        | T | 0.166 | NA | -0.0245 | 0.0175 | 0.1606               |
| Diastolic BP      | rs4923910   | 15 | NA        | C | 0.178 | NA | -0.0096 | 0.0165 | 0.5601               |
| Diastolic BP      | rs4984497   | 15 | NA        | T | 0.148 | NA | -0.0163 | 0.0169 | 0.3335               |
| Diastolic BP      | rs12596053  | 16 | NA        | C | 0.162 | NA | 0.0440  | 0.0160 | 0.0060               |
| Diastolic BP      | rs12928482  | 16 | NA        | G | 0.147 | NA | 0.0146  | 0.0176 | 0.4047               |
| Diastolic BP      | rs460105    | 16 | NA        | T | 0.178 | NA | -0.0167 | 0.0235 | 0.4766               |
| Diastolic BP      | rs72799341  | 16 | NA        | A | 0.161 | NA | -0.0549 | 0.0184 | 0.0028               |
| Diastolic BP      | rs35565381  | 17 | NA        | C | 0.140 | NA | 0.0163  | 0.0159 | 0.3055               |
| Diastolic BP      | rs4295      | 17 | NA        | C | 0.140 | NA | -0.0469 | 0.0162 | 0.0039               |
| Diastolic BP      | rs67833703  | 17 | NA        | T | 0.147 | NA | -0.0266 | 0.0170 | 0.1172               |
| Diastolic BP      | rs34331990  | 19 | NA        | G | 0.154 | NA | 0.0192  | 0.0163 | 0.2385               |
| Diastolic BP      | rs4808569   | 19 | NA        | C | 0.162 | NA | -0.0104 | 0.0202 | 0.6079               |
| Diastolic BP      | rs8105753   | 19 | NA        | A | 0.137 | NA | 0.0165  | 0.0167 | 0.3218               |
| Diastolic BP      | rs6019378   | 20 | NA        | C | 0.156 | NA | -0.0161 | 0.0155 | 0.2977               |
| Diastolic BP      | rs6060114   | 20 | NA        | T | 0.237 | NA | 0.0043  | 0.0207 | 0.8362               |
| Diastolic BP      | rs6129880   | 20 | NA        | T | 0.174 | NA | -0.0308 | 0.0204 | 0.1323               |
| Diastolic BP      | rs112204826 | 21 | NA        | T | 0.395 | NA | 0.0641  | 0.0500 | 0.2000               |
| Diastolic BP      | rs8139817   | 22 | NA        | C | 0.143 | NA | 0.0301  | 0.0173 | 0.0819               |
| Total cholesterol | rs1077514   | 1  | ASAP3     | T | 0.030 | NA | 0.0029  | 0.0239 | 0.9023               |
| Total cholesterol | rs12027135  | 1  | LDL-CRAP1 | T | 0.027 | NA | 0.0096  | 0.0157 | 0.5393               |

|                   |             |    |              |   |       |    |         |        |                      |
|-------------------|-------------|----|--------------|---|-------|----|---------|--------|----------------------|
| Total cholesterol | rs2131925   | 1  | ANGPTL3      | T | 0.075 | NA | -0.0334 | 0.0164 | 0.0422               |
| Total cholesterol | rs2479409   | 1  | PCSK9        | G | 0.054 | NA | 0.0225  | 0.0184 | 0.2214               |
| Total cholesterol | rs2642442   | 1  | MOSC1        | T | 0.035 | NA | 0.0148  | 0.0184 | 0.4229               |
| Total cholesterol | rs514230    | 1  | IRF2BP2      | T | 0.039 | NA | 0.0233  | 0.0157 | 0.1379               |
| Total cholesterol | rs629301    | 1  | SORT1        | T | 0.134 | NA | 0.0030  | 0.0186 | 0.8711               |
| Total cholesterol | rs7515577   | 1  | EVI5         | A | 0.037 | NA | -0.0317 | 0.0198 | 0.1091               |
| Total cholesterol | rs10490626  | 2  | INSIG2       | G | 0.042 | NA | 0.0451  | 0.0286 | 0.1152               |
| Total cholesterol | rs11563251  | 2  | UGT1A1       | T | 0.037 | NA | 0.0315  | 0.0265 | 0.2342               |
| Total cholesterol | rs11694172  | 2  | FAM117B      | G | 0.028 | NA | 0.0049  | 0.0193 | 0.7986               |
| Total cholesterol | rs1260326   | 2  | GCKR         | T | 0.051 | NA | -0.0008 | 0.0161 | 0.9608               |
| Total cholesterol | rs1367117   | 2  | APOB         | A | 0.100 | NA | 0.0057  | 0.0172 | 0.7400               |
| Total cholesterol | rs2030746   | 2  | LOC84931     | T | 0.020 | NA | -0.0047 | 0.0165 | 0.7756               |
| Total cholesterol | rs2287623   | 2  | ABCB11       | G | 0.027 | NA | 0.0210  | 0.0158 | 0.1840               |
| Total cholesterol | rs4299376   | 2  | ABCG5/8      | G | 0.079 | NA | -0.018  | 0.0172 | 0.2952               |
| Total cholesterol | rs7570971   | 2  | RAB3GAP1     | A | 0.030 | NA | 0.0285  | 0.0176 | 0.1048               |
| Total cholesterol | rs13315871  | 3  | PXK          | G | 0.036 | NA | 0.0030  | 0.0264 | 0.9103               |
| Total cholesterol | rs2290159   | 3  | RAF1         | G | 0.037 | NA | -0.0445 | 0.0187 | 0.0174               |
| Total cholesterol | rs7640978   | 3  | CMTM6        | C | 0.038 | NA | 0.0136  | 0.0282 | 0.6293               |
| Total cholesterol | rs6831256   | 4  | LRPAP1       | G | 0.025 | NA | 0.0124  | 0.0157 | 0.4296               |
| Total cholesterol | rs12916     | 5  | HMGCR        | C | 0.068 | NA | 0.0047  | 0.0164 | 0.7734               |
| Total cholesterol | rs4530754   | 5  | CSNK1G3      | A | 0.023 | NA | 0.0216  | 0.0155 | 0.1621               |
| Total cholesterol | rs6882076   | 5  | TIMD4        | C | 0.051 | NA | 0.0084  | 0.0169 | 0.6190               |
| Total cholesterol | rs114342608 | 6  | HLA          | C | 0.048 | NA | 0.1008  | 0.0226 | 7.9×10 <sup>-6</sup> |
| Total cholesterol | rs1564348   | 6  | LPA          | C | 0.049 | NA | 0.0074  | 0.0219 | 0.7366               |
| Total cholesterol | rs1800562   | 6  | HFE          | G | 0.056 | NA | 0.0171  | 0.0328 | 0.6022               |
| Total cholesterol | rs2758886   | 6  | KCNK17       | A | 0.023 | NA | -0.0030 | 0.0166 | 0.8571               |
| Total cholesterol | rs2814982   | 6  | C6orf106     | C | 0.044 | NA | -0.0008 | 0.0261 | 0.9744               |
| Total cholesterol | rs3757354   | 6  | MYLIP        | C | 0.035 | NA | -0.0127 | 0.0197 | 0.5209               |
| Total cholesterol | rs9376090   | 6  | HBS1L        | T | 0.025 | NA | -0.0006 | 0.0180 | 0.9717               |
| Total cholesterol | rs9488822   | 6  | FRK          | T | 0.034 | NA | 0.0198  | 0.0167 | 0.2364               |
| Total cholesterol | rs12670798  | 7  | DNAH11       | C | 0.036 | NA | 0.0086  | 0.0190 | 0.6529               |
| Total cholesterol | rs1997243   | 7  | GPR146       | G | 0.033 | NA | 0.0249  | 0.0210 | 0.2364               |
| Total cholesterol | rs2072183   | 7  | NPC1L1       | C | 0.036 | NA | -0.0306 | 0.0223 | 0.1692               |
| Total cholesterol | rs4722551   | 7  | MIR148A      | C | 0.029 | NA | -0.0221 | 0.0216 | 0.3072               |
| Total cholesterol | rs10102164  | 8  | SOX17        | A | 0.030 | NA | 0.0135  | 0.0200 | 0.4979               |
| Total cholesterol | rs11136341  | 8  | PLEC1        | G | 0.038 | NA | 0.0189  | 0.0180 | 0.2932               |
| Total cholesterol | rs1495741   | 8  | NAT2         | G | 0.032 | NA | -0.0041 | 0.0186 | 0.8269               |
| Total cholesterol | rs2081687   | 8  | CYP7A1       | T | 0.038 | NA | 0.0007  | 0.0163 | 0.9646               |
| Total cholesterol | rs2954029   | 8  | TRIB1        | A | 0.062 | NA | 0.0137  | 0.0160 | 0.3908               |
| Total cholesterol | rs4841132   | 8  | PPP1R3B      | G | 0.078 | NA | -0.014  | 0.0279 | 0.6147               |
| Total cholesterol | rs1883025   | 9  | ABCA1        | C | 0.067 | NA | -0.0705 | 0.0182 | 0.0001               |
| Total cholesterol | rs3780181   | 9  | VLDL-CR      | A | 0.044 | NA | 0.0707  | 0.0306 | 0.0209               |
| Total cholesterol | rs581080    | 9  | TTC39B       | C | 0.038 | NA | 0.0163  | 0.0208 | 0.4346               |
| Total cholesterol | rs635634    | 9  | ABO          | T | 0.069 | NA | -0.0055 | 0.0195 | 0.7793               |
| Total cholesterol | rs10904908  | 10 | VIM-CUBN     | G | 0.025 | NA | 0.0024  | 0.0159 | 0.8826               |
| Total cholesterol | rs2255141   | 10 | GPAM         | A | 0.031 | NA | 0.0129  | 0.0168 | 0.4451               |
| Total cholesterol | rs970548    | 10 | MARCH8-ALOX5 | C | 0.025 | NA | 0.0050  | 0.0178 | 0.7767               |
| Total cholesterol | rs10128711  | 11 | SPTY2D1      | C | 0.031 | NA | -0.0003 | 0.0182 | 0.9877               |

|                   |            |    |            |   |        |    |         |        |                        |
|-------------------|------------|----|------------|---|--------|----|---------|--------|------------------------|
| Total cholesterol | rs11220462 | 11 | ST3GAL4    | A | 0.047  | NA | 0.0183  | 0.0225 | 0.4154                 |
| Total cholesterol | rs11603023 | 11 | PHLDB1     | T | 0.022  | NA | 0.0064  | 0.0161 | 0.6917                 |
| Total cholesterol | rs174546   | 11 | FADS1-2-3  | C | 0.048  | NA | 0.0104  | 0.0168 | 0.5374                 |
| Total cholesterol | rs6589939  | 11 | UBASH3B    | G | 0.0311 | NA | 0.0302  | 0.0161 | 0.0605                 |
| Total cholesterol | rs964184   | 11 | APOA1      | G | 0.121  | NA | 0.0207  | 0.0226 | 0.3617                 |
| Total cholesterol | rs11065987 | 12 | BRAP       | A | 0.031  | NA | 0.0123  | 0.0159 | 0.4368                 |
| Total cholesterol | rs1169288  | 12 | HNF1A      | C | 0.032  | NA | -0.0167 | 0.0169 | 0.3213                 |
| Total cholesterol | rs4883201  | 12 | PHC1-A2ML1 | A | 0.035  | NA | 0.0249  | 0.0263 | 0.3451                 |
| Total cholesterol | rs1532085  | 15 | LIPC       | A | 0.054  | NA | -0.0390 | 0.0160 | 0.0148                 |
| Total cholesterol | rs2000999  | 16 | HPR        | A | 0.062  | NA | -0.0082 | 0.0195 | 0.6764                 |
| Total cholesterol | rs3764261  | 16 | CETP       | A | 0.050  | NA | 0.0032  | 0.0165 | 0.8462                 |
| Total cholesterol | rs314253   | 17 | DLG4       | T | 0.023  | NA | -0.0244 | 0.0166 | 0.1417                 |
| Total cholesterol | rs7206971  | 17 | OSBPL7     | A | 0.030  | NA | -0.0535 | 0.0167 | 0.0014                 |
| Total cholesterol | rs7241918  | 18 | LIPG       | T | 0.058  | NA | -0.0149 | 0.0211 | 0.4798                 |
| Total cholesterol | rs10401969 | 19 | CILP2      | T | 0.137  | NA | 0.0163  | 0.0346 | 0.6368                 |
| Total cholesterol | rs492602   | 19 | FLJ36070   | G | 0.031  | NA | 0.0249  | 0.0162 | 0.1230                 |
| Total cholesterol | rs6511720  | 19 | LDL-CR     | G | 0.185  | NA | 0.0095  | 0.0260 | 0.7143                 |
| Total cholesterol | rs6857     | 19 | APOE       | T | 0.164  | NA | 1.1610  | 0.0226 | 2.5×10 <sup>-575</sup> |
| Total cholesterol | rs1800961  | 20 | HNF4A      | C | 0.106  | NA | -0.0596 | 0.0467 | 0.2016                 |
| Total cholesterol | rs2277862  | 20 | ERGIC3     | C | 0.035  | NA | -0.018  | 0.0218 | 0.4102                 |
| Total cholesterol | rs2902940  | 20 | MAFB       | A | 0.024  | NA | -0.0112 | 0.0173 | 0.5176                 |
| Total cholesterol | rs6029526  | 20 | TOP1       | A | 0.040  | NA | 0.0084  | 0.0156 | 0.5902                 |
| Total cholesterol | rs138777   | 22 | TOM1       | A | 0.021  | NA | 0.0096  | 0.0163 | 0.5554                 |
| Total cholesterol | rs4253772  | 22 | PPARA      | T | 0.032  | NA | 0.0090  | 0.0255 | 0.7240                 |
| HDL cholesterol   | rs12145743 | 1  | HDGF-PMVK  | G | 0.020  | NA | 0.0253  | 0.0167 | 0.1290                 |
| HDL cholesterol   | rs12748152 | 1  | PIGV-NROB2 | C | 0.051  | NA | -0.0344 | 0.0295 | 0.2429                 |
| HDL cholesterol   | rs1689800  | 1  | ZNF648     | A | 0.034  | NA | -0.0028 | 0.0160 | 0.8607                 |
| HDL cholesterol   | rs4650994  | 1  | ANGPTL1    | G | 0.021  | NA | -0.0040 | 0.0155 | 0.7969                 |
| HDL cholesterol   | rs4660293  | 1  | PABPC4     | A | 0.035  | NA | -0.0181 | 0.0188 | 0.3358                 |
| HDL cholesterol   | rs4846914  | 1  | GALNT2     | A | 0.048  | NA | 0.0077  | 0.0166 | 0.6404                 |
| HDL cholesterol   | rs1047891  | 2  | CPS1       | C | 0.027  | NA | 0.0154  | 0.0195 | 0.4316                 |
| HDL cholesterol   | rs12328675 | 2  | COBLL1     | C | 0.045  | NA | 0.0020  | 0.0241 | 0.9350                 |
| HDL cholesterol   | rs2972146  | 2  | IRS1       | G | 0.032  | NA | -0.0131 | 0.0159 | 0.4116                 |
| HDL cholesterol   | rs13326165 | 3  | STAB1      | A | 0.029  | NA | 0.0312  | 0.0195 | 0.1088                 |
| HDL cholesterol   | rs17404153 | 3  | ACAD11     | G | 0.028  | NA | 0.0140  | 0.0245 | 0.5682                 |
| HDL cholesterol   | rs2013208  | 3  | RBM5       | T | 0.025  | NA | -0.0174 | 0.016  | 0.2780                 |
| HDL cholesterol   | rs2290547  | 3  | SETD2      | G | 0.030  | NA | 0.0015  | 0.0209 | 0.9435                 |
| HDL cholesterol   | rs2606736  | 3  | ATG7       | C | 0.025  | NA | 0.0011  | 0.0165 | 0.9457                 |
| HDL cholesterol   | rs6805251  | 3  | GSK3B      | T | 0.020  | NA | -0.0143 | 0.0157 | 0.3626                 |
| HDL cholesterol   | rs10019888 | 4  | C4orf52    | A | 0.027  | NA | 0.0022  | 0.0208 | 0.9173                 |
| HDL cholesterol   | rs13107325 | 4  | SLC39A8    | C | 0.071  | NA | -0.0509 | 0.0308 | 0.0983                 |
| HDL cholesterol   | rs2602836  | 4  | ADH5       | A | 0.019  | NA | -0.0242 | 0.0156 | 0.1208                 |
| HDL cholesterol   | rs3822072  | 4  | FAM13A     | G | 0.025  | NA | -0.0096 | 0.0157 | 0.5413                 |
| HDL cholesterol   | rs6450176  | 5  | ARL15      | G | 0.025  | NA | 0.0201  | 0.0176 | 0.2553                 |
| HDL cholesterol   | rs1936800  | 6  | RSPO3      | C | 0.020  | NA | -0.0061 | 0.0157 | 0.6995                 |
| HDL cholesterol   | rs605066   | 6  | CITED2     | T | 0.028  | NA | 0.0022  | 0.0158 | 0.8904                 |
| HDL cholesterol   | rs998584   | 6  | VEGFA      | C | 0.026  | NA | 0.0292  | 0.0181 | 0.1061                 |
| HDL cholesterol   | rs17145738 | 7  | MLXIPL     | T | 0.041  | NA | 0.0255  | 0.0243 | 0.2943                 |

|                 |            |    |              |   |        |    |         |        |                        |
|-----------------|------------|----|--------------|---|--------|----|---------|--------|------------------------|
| HDL cholesterol | rs17173637 | 7  | TMEM176A     | T | 0.036  | NA | -0.0143 | 0.0283 | 0.6142                 |
| HDL cholesterol | rs4142995  | 7  | SNX13        | G | 0.026  | NA | 0.0145  | 0.0161 | 0.3682                 |
| HDL cholesterol | rs4731702  | 7  | KLF14        | T | 0.029  | NA | 0.0045  | 0.0165 | 0.7841                 |
| HDL cholesterol | rs4917014  | 7  | IKZF1        | G | 0.022  | NA | 0.0370  | 0.0168 | 0.0275                 |
| HDL cholesterol | rs702485   | 7  | DAGLB        | G | 0.024  | NA | -0.0486 | 0.0156 | 0.0019                 |
| HDL cholesterol | rs12678919 | 8  | LPL          | G | 0.155  | NA | 0.0105  | 0.0251 | 0.6759                 |
| HDL cholesterol | rs2293889  | 8  | TRPS1        | G | 0.031  | NA | 0.0305  | 0.0164 | 0.0622                 |
| HDL cholesterol | rs2954029  | 8  | TRIB1        | T | 0.040  | NA | -0.0137 | 0.0160 | 0.3908                 |
| HDL cholesterol | rs4841132  | 8  | PPP1R3B      | G | 0.0816 | NA | -0.014  | 0.0279 | 0.6147                 |
| HDL cholesterol | rs1883025  | 9  | ABCA1        | C | 0.070  | NA | -0.0705 | 0.0182 | 0.0001                 |
| HDL cholesterol | rs581080   | 9  | TTC39B       | C | 0.042  | NA | 0.0163  | 0.0208 | 0.4346                 |
| HDL cholesterol | rs970548   | 10 | MARCH8-ALOX5 | C | 0.026  | NA | 0.0050  | 0.0178 | 0.7767                 |
| HDL cholesterol | rs11246602 | 11 | OR4C46       | C | 0.034  | NA | 0.0333  | 0.0256 | 0.1933                 |
| HDL cholesterol | rs12801636 | 11 | KAT5         | A | 0.024  | NA | -0.0118 | 0.0185 | 0.5242                 |
| HDL cholesterol | rs174546   | 11 | FADS1-2-3    | C | 0.039  | NA | 0.0104  | 0.0168 | 0.5374                 |
| HDL cholesterol | rs2923084  | 11 | AMPD3        | A | 0.026  | NA | 0.0321  | 0.0200 | 0.1091                 |
| HDL cholesterol | rs3136441  | 11 | LRP4         | C | 0.054  | NA | 0.0132  | 0.0232 | 0.5708                 |
| HDL cholesterol | rs499974   | 11 | MOGAT2-DGAT2 | C | 0.026  | NA | -0.0108 | 0.0212 | 0.6101                 |
| HDL cholesterol | rs6589939  | 11 | UBASH3B      | G | 0.0224 | NA | 0.0302  | 0.0161 | 0.0605                 |
| HDL cholesterol | rs964184   | 11 | APOA1        | C | 0.106  | NA | -0.0207 | 0.0226 | 0.3617                 |
| HDL cholesterol | rs11613352 | 12 | LRP1         | T | 0.028  | NA | 0.0106  | 0.0185 | 0.5644                 |
| HDL cholesterol | rs4759375  | 12 | SBNO1        | T | 0.056  | NA | -0.0361 | 0.0267 | 0.1756                 |
| HDL cholesterol | rs4765127  | 12 | ZNF664       | T | 0.032  | NA | 0.0102  | 0.0161 | 0.5278                 |
| HDL cholesterol | rs7134375  | 12 | PDE3A        | A | 0.021  | NA | -0.0016 | 0.0159 | 0.9206                 |
| HDL cholesterol | rs7134594  | 12 | MVK          | T | 0.035  | NA | 0.0210  | 0.0158 | 0.1853                 |
| HDL cholesterol | rs838880   | 12 | SCARB1       | C | 0.048  | NA | 0.0066  | 0.0177 | 0.7092                 |
| HDL cholesterol | rs4983559  | 14 | ZBTB42-AKT1  | G | 0.020  | NA | -0.0256 | 0.0173 | 0.1394                 |
| HDL cholesterol | rs1532085  | 15 | LIPC         | A | 0.107  | NA | -0.0390 | 0.0160 | 0.0148                 |
| HDL cholesterol | rs2652834  | 15 | LACTB        | G | 0.028  | NA | 0.0449  | 0.0192 | 0.0197                 |
| HDL cholesterol | rs1121980  | 16 | FTO          | G | 0.020  | NA | -0.0005 | 0.0157 | 0.9724                 |
| HDL cholesterol | rs16942887 | 16 | LCAT         | A | 0.083  | NA | 0.0046  | 0.0237 | 0.8452                 |
| HDL cholesterol | rs2925979  | 16 | CMIP         | C | 0.035  | NA | -0.0063 | 0.0175 | 0.7195                 |
| HDL cholesterol | rs3764261  | 16 | CETP         | A | 0.241  | NA | 0.0032  | 0.0165 | 0.8462                 |
| HDL cholesterol | rs11869286 | 17 | STARD3       | C | 0.032  | NA | 0.0144  | 0.0165 | 0.3828                 |
| HDL cholesterol | rs4129767  | 17 | PGS1         | A | 0.024  | NA | 0.0350  | 0.0156 | 0.0245                 |
| HDL cholesterol | rs4148008  | 17 | ABCA8        | C | 0.028  | NA | 0.0177  | 0.0164 | 0.2795                 |
| HDL cholesterol | rs12967135 | 18 | MC4R         | G | 0.026  | NA | 0.0348  | 0.0182 | 0.0562                 |
| HDL cholesterol | rs7241918  | 18 | LIPG         | T | 0.090  | NA | -0.0149 | 0.0211 | 0.4798                 |
| HDL cholesterol | rs17695224 | 19 | HAS1         | G | 0.029  | NA | 0.0019  | 0.0174 | 0.9126                 |
| HDL cholesterol | rs386000   | 19 | LILRA3       | C | 0.048  | NA | 0.0207  | 0.0213 | 0.3308                 |
| HDL cholesterol | rs6857     | 19 | APOE         | C | 0.067  | NA | -1.1610 | 0.0226 | 2.5×10 <sup>-575</sup> |
| HDL cholesterol | rs7255436  | 19 | ANGPTL4      | A | 0.032  | NA | -0.0282 | 0.0162 | 0.0824                 |
| HDL cholesterol | rs731839   | 19 | PEPD         | A | 0.022  | NA | -0.0102 | 0.0168 | 0.5428                 |
| HDL cholesterol | rs737337   | 19 | ANGPTL8      | T | 0.056  | NA | -0.0416 | 0.0311 | 0.1821                 |
| HDL cholesterol | rs1800961  | 20 | HNFA4        | C | 0.127  | NA | -0.0596 | 0.0467 | 0.2016                 |
| HDL cholesterol | rs6065906  | 20 | PLTP         | T | 0.059  | NA | 0.0153  | 0.0192 | 0.4275                 |
| HDL cholesterol | rs181360   | 22 | UBE2L3       | T | 0.038  | NA | 0.0699  | 0.0203 | 0.0006                 |
| LDL cholesterol | rs12027135 | 1  | LDL-CRAP1    | T | 0.030  | NA | 0.0096  | 0.0157 | 0.5393                 |

|                 |            |    |             |   |       |    |         |        |        |
|-----------------|------------|----|-------------|---|-------|----|---------|--------|--------|
| LDL cholesterol | rs12748152 | 1  | PIGV-NR0B2  | T | 0.050 | NA | 0.0344  | 0.0295 | 0.2429 |
| LDL cholesterol | rs2131925  | 1  | ANGPTL3     | T | 0.049 | NA | -0.0334 | 0.0164 | 0.0422 |
| LDL cholesterol | rs2479409  | 1  | PCSK9       | G | 0.064 | NA | 0.0225  | 0.0184 | 0.2214 |
| LDL cholesterol | rs2642442  | 1  | MOSC1       | T | 0.036 | NA | 0.0148  | 0.0184 | 0.4229 |
| LDL cholesterol | rs267733   | 1  | ANXA9-CERS2 | A | 0.033 | NA | 0.0409  | 0.0217 | 0.0593 |
| LDL cholesterol | rs514230   | 1  | IRF2BP2     | T | 0.036 | NA | 0.0233  | 0.0157 | 0.1379 |
| LDL cholesterol | rs629301   | 1  | SORT1       | T | 0.167 | NA | 0.0030  | 0.0186 | 0.8711 |
| LDL cholesterol | rs10490626 | 2  | INSIG2      | G | 0.051 | NA | 0.0451  | 0.0286 | 0.1152 |
| LDL cholesterol | rs11563251 | 2  | UGT1A1      | T | 0.034 | NA | 0.0315  | 0.0265 | 0.2342 |
| LDL cholesterol | rs1250229  | 2  | FN1         | C | 0.024 | NA | 0.0183  | 0.0188 | 0.3303 |
| LDL cholesterol | rs1367117  | 2  | APOB        | A | 0.119 | NA | 0.0057  | 0.0172 | 0.7400 |
| LDL cholesterol | rs2030746  | 2  | LOC84931    | T | 0.021 | NA | -0.0047 | 0.0165 | 0.7756 |
| LDL cholesterol | rs2710642  | 2  | EHBP1       | A | 0.024 | NA | 0.0046  | 0.0162 | 0.7752 |
| LDL cholesterol | rs4299376  | 2  | ABCG5/8     | G | 0.081 | NA | -0.018  | 0.0172 | 0.2952 |
| LDL cholesterol | rs17404153 | 3  | ACAD11      | G | 0.034 | NA | 0.0140  | 0.0245 | 0.5682 |
| LDL cholesterol | rs7640978  | 3  | CMTM6       | C | 0.039 | NA | 0.0136  | 0.0282 | 0.6293 |
| LDL cholesterol | rs6831256  | 4  | LRPAP1      | G | 0.022 | NA | 0.0124  | 0.0157 | 0.4296 |
| LDL cholesterol | rs12916    | 5  | HMGCR       | C | 0.073 | NA | 0.0047  | 0.0164 | 0.7734 |
| LDL cholesterol | rs4530754  | 5  | CSNK1G3     | A | 0.028 | NA | 0.0216  | 0.0155 | 0.1621 |
| LDL cholesterol | rs6882076  | 5  | TIMD4       | C | 0.046 | NA | 0.0084  | 0.0169 | 0.6190 |
| LDL cholesterol | rs1564348  | 6  | LPA         | C | 0.048 | NA | 0.0074  | 0.0219 | 0.7366 |
| LDL cholesterol | rs1800562  | 6  | HFE         | G | 0.062 | NA | 0.0171  | 0.0328 | 0.6022 |
| LDL cholesterol | rs3757354  | 6  | MYLIP       | C | 0.038 | NA | -0.0127 | 0.0197 | 0.5209 |
| LDL cholesterol | rs9488822  | 6  | FRK         | T | 0.031 | NA | 0.0198  | 0.0167 | 0.2364 |
| LDL cholesterol | rs12670798 | 7  | DNAH11      | C | 0.034 | NA | 0.0086  | 0.0190 | 0.6529 |
| LDL cholesterol | rs2072183  | 7  | NPC1L1      | C | 0.039 | NA | -0.0306 | 0.0223 | 0.1692 |
| LDL cholesterol | rs4722551  | 7  | MIR148A     | C | 0.039 | NA | -0.0221 | 0.0216 | 0.3072 |
| LDL cholesterol | rs10102164 | 8  | SOX17       | A | 0.032 | NA | 0.0135  | 0.0200 | 0.4979 |
| LDL cholesterol | rs11136341 | 8  | PLEC1       | G | 0.045 | NA | 0.0189  | 0.0180 | 0.2932 |
| LDL cholesterol | rs2081687  | 8  | CYP7A1      | T | 0.031 | NA | 0.0007  | 0.0163 | 0.9646 |
| LDL cholesterol | rs2954029  | 8  | TRIB1       | A | 0.056 | NA | 0.0137  | 0.0160 | 0.3908 |
| LDL cholesterol | rs4841132  | 8  | PPP1R3B     | G | 0.067 | NA | -0.014  | 0.0279 | 0.6147 |
| LDL cholesterol | rs3780181  | 9  | VLDL-CR     | A | 0.044 | NA | 0.0707  | 0.0306 | 0.0209 |
| LDL cholesterol | rs635634   | 9  | ABO         | T | 0.077 | NA | -0.0055 | 0.0195 | 0.7793 |
| LDL cholesterol | rs2255141  | 10 | GPAM        | A | 0.030 | NA | 0.0129  | 0.0168 | 0.4451 |
| LDL cholesterol | rs11220462 | 11 | ST3GAL4     | A | 0.059 | NA | 0.0183  | 0.0225 | 0.4154 |
| LDL cholesterol | rs174546   | 11 | FADS1-2-3   | C | 0.051 | NA | 0.0104  | 0.0168 | 0.5374 |
| LDL cholesterol | rs964184   | 11 | APOA1       | G | 0.086 | NA | 0.0207  | 0.0226 | 0.3617 |
| LDL cholesterol | rs11065987 | 12 | BRAP        | A | 0.027 | NA | 0.0123  | 0.0159 | 0.4368 |
| LDL cholesterol | rs1169288  | 12 | HNF1A       | C | 0.038 | NA | -0.0167 | 0.0169 | 0.3213 |
| LDL cholesterol | rs4942486  | 13 | BRCA2       | T | 0.024 | NA | 0.0131  | 0.0159 | 0.4080 |
| LDL cholesterol | rs8017377  | 14 | NYNRIN      | A | 0.030 | NA | -0.0092 | 0.0160 | 0.5678 |
| LDL cholesterol | rs2000999  | 16 | HPR         | A | 0.065 | NA | -0.0082 | 0.0195 | 0.6764 |
| LDL cholesterol | rs3764261  | 16 | CETP        | C | 0.053 | NA | -0.0032 | 0.0165 | 0.8462 |
| LDL cholesterol | rs1801689  | 17 | APOH-PRXCA  | C | 0.103 | NA | -0.1437 | 0.0759 | 0.0583 |
| LDL cholesterol | rs314253   | 17 | DLG4        | T | 0.024 | NA | -0.0244 | 0.0166 | 0.1417 |
| LDL cholesterol | rs7206971  | 17 | OSBPL7      | A | 0.029 | NA | -0.0535 | 0.0167 | 0.0014 |
| LDL cholesterol | rs10401969 | 19 | CILP2       | T | 0.118 | NA | 0.0163  | 0.0346 | 0.6368 |

|                 |             |    |            |   |       |    |         |        |                        |
|-----------------|-------------|----|------------|---|-------|----|---------|--------|------------------------|
| LDL cholesterol | rs6511720   | 19 | LDL-CR     | G | 0.221 | NA | 0.0095  | 0.026  | 0.7143                 |
| LDL cholesterol | rs6857      | 19 | APOE       | T | 0.192 | NA | 1.1610  | 0.0226 | 2.5×10 <sup>-575</sup> |
| LDL cholesterol | rs2328223   | 20 | SNX5       | C | 0.030 | NA | 0.0428  | 0.0198 | 0.0310                 |
| LDL cholesterol | rs2902940   | 20 | MAFB       | A | 0.027 | NA | -0.0112 | 0.0173 | 0.5176                 |
| LDL cholesterol | rs364585    | 20 | SPTLC3     | G | 0.025 | NA | -0.0137 | 0.0158 | 0.3850                 |
| LDL cholesterol | rs6029526   | 20 | TOP1       | A | 0.044 | NA | 0.0084  | 0.0156 | 0.5902                 |
| LDL cholesterol | rs4253772   | 22 | PPARA      | T | 0.031 | NA | 0.0090  | 0.0255 | 0.7240                 |
| LDL cholesterol | rs5763662   | 22 | MTMR3      | T | 0.077 | NA | 0.0183  | 0.0508 | 0.7194                 |
| Triglycerides   | rs12748152  | 1  | PIGV-NROB2 | T | 0.037 | NA | 0.0344  | 0.0295 | 0.2429                 |
| Triglycerides   | rs2131925   | 1  | ANGPTL3    | T | 0.066 | NA | -0.0334 | 0.0164 | 0.04223                |
| Triglycerides   | rs4846914   | 1  | GALNT2     | G | 0.040 | NA | -0.0077 | 0.0166 | 0.6404                 |
| Triglycerides   | rs1260326   | 2  | GCKR       | T | 0.115 | NA | -0.0008 | 0.0161 | 0.9608                 |
| Triglycerides   | rs2972146   | 2  | IRS1       | T | 0.028 | NA | 0.0131  | 0.0159 | 0.4116                 |
| Triglycerides   | rs150213942 | 3  | MSL2L1     | G | 0.029 | NA | -0.0302 | 0.0184 | 0.1011                 |
| Triglycerides   | rs442177    | 4  | KLHL8      | T | 0.031 | NA | 0.0026  | 0.0159 | 0.8675                 |
| Triglycerides   | rs6831256   | 4  | LRPAP1     | G | 0.026 | NA | 0.0124  | 0.0157 | 0.4296                 |
| Triglycerides   | rs6882076   | 5  | TIMD4      | C | 0.029 | NA | 0.0084  | 0.0169 | 0.6190                 |
| Triglycerides   | rs9686661   | 5  | MAP3K1     | T | 0.038 | NA | 0.0263  | 0.0205 | 0.1993                 |
| Triglycerides   | rs1936800   | 6  | RSPO3      | T | 0.020 | NA | 0.0061  | 0.0157 | 0.6995                 |
| Triglycerides   | rs998584    | 6  | VEGFA      | A | 0.029 | NA | -0.0292 | 0.0181 | 0.1061                 |
| Triglycerides   | rs13238203  | 7  | TYW1B      | C | 0.059 | NA | 0.0110  | 0.0663 | 0.8677                 |
| Triglycerides   | rs17145738  | 7  | MLXIPL     | C | 0.115 | NA | -0.0255 | 0.0243 | 0.2943                 |
| Triglycerides   | rs38855     | 7  | MET        | A | 0.019 | NA | -0.0048 | 0.0154 | 0.7554                 |
| Triglycerides   | rs4722551   | 7  | MIR148A    | C | 0.023 | NA | -0.0221 | 0.0216 | 0.3072                 |
| Triglycerides   | rs11776767  | 8  | PINX1      | C | 0.022 | NA | -0.0428 | 0.0159 | 0.0071                 |
| Triglycerides   | rs12678919  | 8  | LPL        | A | 0.170 | NA | -0.0105 | 0.0251 | 0.6759                 |
| Triglycerides   | rs1495741   | 8  | NAT2       | G | 0.040 | NA | -0.0041 | 0.0186 | 0.8269                 |
| Triglycerides   | rs2954029   | 8  | TRIB1      | A | 0.076 | NA | 0.0137  | 0.0160 | 0.3908                 |
| Triglycerides   | rs10761731  | 10 | JMJD1C     | A | 0.031 | NA | 0.0215  | 0.0156 | 0.1678                 |
| Triglycerides   | rs1832007   | 10 | AKR1C4     | A | 0.033 | NA | 0.0088  | 0.0216 | 0.6842                 |
| Triglycerides   | rs2068888   | 10 | CYP26A1    | G | 0.024 | NA | 0.0209  | 0.0162 | 0.1973                 |
| Triglycerides   | rs174546    | 11 | FADS1-2-3  | T | 0.045 | NA | -0.0104 | 0.0168 | 0.5374                 |
| Triglycerides   | rs964184    | 11 | APOA1      | G | 0.234 | NA | 0.0207  | 0.0226 | 0.3617                 |
| Triglycerides   | rs11613352  | 12 | LRP1       | C | 0.028 | NA | -0.0106 | 0.0185 | 0.5644                 |
| Triglycerides   | rs4765127   | 12 | ZNF664     | G | 0.029 | NA | -0.0102 | 0.0161 | 0.5278                 |
| Triglycerides   | rs1532085   | 15 | LIPC       | A | 0.031 | NA | -0.0390 | 0.0160 | 0.0148                 |
| Triglycerides   | rs2412710   | 15 | CAPN3      | A | 0.099 | NA | -0.0276 | 0.0580 | 0.6348                 |
| Triglycerides   | rs2929282   | 15 | FRMD5      | T | 0.072 | NA | -0.0339 | 0.0357 | 0.3422                 |
| Triglycerides   | rs1121980   | 16 | FTO        | A | 0.021 | NA | 0.0005  | 0.0157 | 0.9724                 |
| Triglycerides   | rs11649653  | 16 | CTF1       | C | 0.027 | NA | -0.0407 | 0.0173 | 0.0184                 |
| Triglycerides   | rs3198697   | 16 | PDXDC1     | C | 0.020 | NA | 0.0152  | 0.0164 | 0.3527                 |
| Triglycerides   | rs3764261   | 16 | CETP       | C | 0.040 | NA | -0.0032 | 0.0165 | 0.8462                 |
| Triglycerides   | rs8077889   | 17 | MPP3       | C | 0.025 | NA | -0.0301 | 0.0196 | 0.1245                 |
| Triglycerides   | rs10401969  | 19 | CILP2      | T | 0.121 | NA | 0.0163  | 0.0346 | 0.6368                 |
| Triglycerides   | rs7248104   | 19 | INSR       | G | 0.022 | NA | 0.0111  | 0.0161 | 0.4912                 |
| Triglycerides   | rs731839    | 19 | PEPD       | G | 0.022 | NA | 0.0102  | 0.0168 | 0.5428                 |
| Triglycerides   | rs6065906   | 20 | PLTP       | C | 0.053 | NA | -0.0153 | 0.0192 | 0.4275                 |
| Triglycerides   | rs5756931   | 22 | PLA2G6     | T | 0.020 | NA | -0.0030 | 0.0161 | 0.8527                 |

|                    |            |    |            |   |       |       |         |        |                        |
|--------------------|------------|----|------------|---|-------|-------|---------|--------|------------------------|
| C-reactive protein | rs12037222 | 1  | PABPC4     | A | 0.045 | 0.007 | 0.0175  | 0.0193 | 0.3640                 |
| C-reactive protein | rs12239046 | 1  | NLRP3      | C | 0.047 | 0.006 | -0.0006 | 0.0171 | 0.9726                 |
| C-reactive protein | rs2794520  | 1  | CRP        | C | 0.160 | 0.006 | 0.0090  | 0.0168 | 0.5938                 |
| C-reactive protein | rs4129267  | 1  | IL6R       | C | 0.079 | 0.005 | -0.0006 | 0.0162 | 0.9683                 |
| C-reactive protein | rs4420065  | 1  | LEPR       | C | 0.090 | 0.005 | -0.0206 | 0.0164 | 0.2096                 |
| C-reactive protein | rs1260326  | 2  | GCKR       | T | 0.072 | 0.005 | -0.0008 | 0.0161 | 0.9608                 |
| C-reactive protein | rs6734238  | 2  | IL1F10     | G | 0.050 | 0.006 | 0.0035  | 0.0156 | 0.8204                 |
| C-reactive protein | rs4705952  | 5  | IRF1       | G | 0.042 | 0.007 | 0.0046  | 0.0197 | 0.8133                 |
| C-reactive protein | rs6901250  | 6  | GPRC6A     | A | 0.035 | 0.006 | 0.0082  | 0.0171 | 0.6316                 |
| C-reactive protein | rs13233571 | 7  | BCL7B      | C | 0.054 | 0.009 | -0.0436 | 0.0273 | 0.1098                 |
| C-reactive protein | rs4240624  | 8  | PPP1R3B    | G | 0.069 | 0.011 | 0.0130  | 0.0279 | 0.6399                 |
| C-reactive protein | rs10745954 | 12 | ASCL1      | A | 0.039 | 0.006 | 0.0051  | 0.0155 | 0.7419                 |
| C-reactive protein | rs1183910  | 12 | HNF1A      | G | 0.149 | 0.006 | 0.0173  | 0.0170 | 0.3083                 |
| C-reactive protein | rs340029   | 15 | RORA       | T | 0.032 | 0.006 | 0.0268  | 0.0165 | 0.1043                 |
| C-reactive protein | rs10521222 | 16 | SALL1      | C | 0.104 | 0.015 | 0.0364  | 0.0397 | 0.3589                 |
| C-reactive protein | rs2847281  | 18 | PTPN2      | A | 0.031 | 0.006 | 0.0062  | 0.0158 | 0.6931                 |
| C-reactive protein | rs12721051 | 19 | APOE/APOC1 | C | 0.236 | 0.009 | -1.3043 | 0.0278 | 7.8×10 <sup>-482</sup> |
| C-reactive protein | rs1800961  | 20 | HNF4A      | C | 0.088 | 0.015 | -0.0596 | 0.0467 | 0.2016                 |

BP = blood pressure; EA = effect allele; HDL = high-density lipoprotein; LDL = low-density lipoprotein; NA, not available; SE = standard error; SNP = single nucleotide polymorphism; WHRadjBMI = waist-to-hip ratio adjusted for body mass index. \*Summary statistics from the International Genomics of Alzheimer's Project (17 008 Alzheimer's disease cases and 37 154 controls). †Effect size estimates ( $\beta$  coefficients) were obtained from published genome-wide association studies of the risk factors (see table S2) and represent one unit change in the risk factor per additional copy of the effect allele. The change is expressed in cigarettes per day for smoking, drinks per week for alcohol, cups per day for coffee, percentage for 25-hydroxyvitamin D, mmol/L for fasting glucose, ln-pmol/L for fasting insulin, mmHg for systolic and diastolic blood pressure, ln-mg/L for C-reactive protein, and standard deviation for the other continuous risk factors. For the binary risk factors, the change is expressed as log-odds of having the risk factor. In the Mendelian randomisation analyses, education was scaled to 1 year of education completed (1 SD = 3.6 years), smoking to 10 cigarettes, 25-hydroxyvitamin D to 20% change, fasting glucose to one SD (assuming one SD = 0.65 mmol/L), fasting insulin to one SD (assuming one SD = 0.60 ln-pmol/L), systolic and diastolic blood pressure to one SD (assuming one SD = 15 mmHg and 9.5 mmHg respectively), and C-reactive protein to one SD (assuming one SD = 1 ln-mg/L). The  $\beta$  coefficients for intelligence were estimated from the reported z-scores.



**Table D.** Association between genetically predicted one year increase in education completed and other modifiable factors\*

| Outcome                               | Estimate (95% CI)                        | P value               |
|---------------------------------------|------------------------------------------|-----------------------|
| <b>Binary outcome</b>                 |                                          |                       |
| Ever smoked†                          | 0.88 (0.84 to 0.92)                      | 4.0×10 <sup>-9</sup>  |
| <b>Continuous outcomes</b>            |                                          |                       |
| Cigarettes per day†                   | -0.43 (-0.73 to -0.13) cig/day           | 0.005                 |
| Systolic blood pressure‡              | -0.17 (-0.52 to 0.18) mmHg               | 0.35                  |
| Diastolic blood pressure‡             | -0.02 (-0.20 to 0.25) mmHg               | 0.84                  |
| Low-density lipoprotein cholesterol§  | -0.01 (-0.02 to 0.01) mmol/L             | 0.54                  |
| High-density lipoprotein cholesterol§ | 0.05 (0.035 to 0.07) mmol/L              | 1.4×10 <sup>-9</sup>  |
| Total cholesterol§                    | 0.00 (-0.02 to 0.02) mmol/L              | 0.87                  |
| Triglycerides§                        | -0.05 (-0.06 to -0.03) mmol/L            | 4.6×10 <sup>-8</sup>  |
| Fasting glucose¶                      | 0.00 (-0.15 to 0.01) mmol/L              | 0.78                  |
| Fasting insulin¶                      | -0.02 (-0.03 to -0.01) log pmol/L        | 0.004                 |
| Body mass index**                     | -0.29 (-0.33 to -0.19) kg/m <sup>2</sup> | 2.6×10 <sup>-18</sup> |

\*Analyses are based on 107 to 111 single nucleotide polymorphisms associated with education. †Data from the Tobacco and Genetics Consortium.<sup>11</sup> ‡Data from International Consortium for Blood Pressure (ICBP).<sup>27</sup> §Data from Global Lipids Genetics Consortium (GLGC).<sup>22</sup> ¶Data from Meta-Analyses of Glucose and Insulin-related traits Consortium (MAGIC).<sup>26</sup> \*\*Data from Genetic Investigation of Anthropometric Traits consortium (GIANT).<sup>17</sup>

## References

- 1 Xu W, Tan L, Wang HF, et al. Meta-analysis of modifiable risk factors for Alzheimer's disease. *J Neurol Neurosurg Psychiatry* 2015;86:1299-306. doi: 10.1136/jnnp-2015-310548
- 2 Liu QP, Wu YF, Cheng HY, et al. Habitual coffee consumption and risk of cognitive decline/dementia: A systematic review and meta-analysis of prospective cohort studies. *Nutrition* 2016;32:628-36. doi: 10.1016/j.nut.2015.11.015
- 3 Shen L, Ji HF. Vitamin D deficiency is associated with increased risk of Alzheimer's disease and dementia: evidence from meta-analysis. *Nutr J* 2015;14:76. doi: 10.1186/s12937-015-0063-7
- 4 Meng XF, Yu JT, Wang HF, et al. Midlife vascular risk factors and the risk of Alzheimer's disease: a systematic review and meta-analysis. *J Alzheimers Dis* 2014;42:1295-310. doi: 10.3233/JAD-140954
- 5 Koyama A, O'Brien J, Weuve J, et al. The role of peripheral inflammatory markers in dementia and Alzheimer's disease: a meta-analysis. *J Gerontol A Biol Sci Med Sci* 2013;68:433-40. doi: 10.1093/gerona/gls187
- 6 Feart C, Helmer C, Merle B, et al. Associations of lower vitamin D concentrations with cognitive decline and long-term risk of dementia and Alzheimer's disease in older adults. *Alzheimers Dement* 2017;13:1207-16. doi: 10.1016/j.jalz.2017.03.003
- 7 Olsson E, Byberg L, Karlstrom B, et al. Vitamin D is not associated with incident dementia or cognitive impairment: an 18-y follow-up study in community-living old men. *Am J Clin Nutr* 2017;105:936-43. doi: 10.3945/ajcn.116.141531
- 8 Okbay A, Beauchamp JP, Fontana MA, et al. Genome-wide association study identifies 74 loci associated with educational attainment. *Nature* 2016;533:539-42. doi: 10.1038/nature17671
- 9 Sniekers S, Stringer S, Watanabe K, et al. Genome-wide association meta-analysis of 78,308 individuals identifies new loci and genes influencing human intelligence. *Nat Genet* 2017;49:1107-12. doi: 10.1038/ng.3869
- 10 Thorgeirsson TE, Gudbjartsson DF, Surakka I, et al. Sequence variants at CHRN3-CHRNA6 and CYP2A6 affect smoking behavior. *Nat Genet* 2010;42:448-53. doi: 10.1038/ng.573
- 11 Genome-wide meta-analyses identify multiple loci associated with smoking behavior. *Nat Genet* 2010;42:441-7. doi: 10.1038/ng.571
- 12 Jorgenson E, Thai KK, Hoffmann TJ, et al. Genetic contributors to variation in alcohol consumption vary by race/ethnicity in a large multi-ethnic genome-wide association study. *Mol Psychiatry* 2017;22:1359-67. doi: 10.1038/mp.2017.101
- 13 Cornelis MC, Byrne EM, Esko T, et al. Genome-wide meta-analysis identifies six novel loci associated with habitual coffee consumption. *Mol Psychiatry* 2015;20:647-56. doi: 10.1038/mp.2014.107
- 14 Vimalaswaran KS, Berry DJ, Lu C, et al. Causal relationship between obesity and vitamin D status: bi-directional Mendelian randomization analysis of multiple cohorts. *PLoS Med* 2013;10:e1001383. doi: 10.1371/journal.pmed.1001383
- 15 Grarup N, Sulem P, Sandholt CH, et al. Genetic architecture of vitamin B12 and folate levels uncovered applying deeply sequenced large datasets. *PLoS Genet* 2013;9:e1003530. doi: 10.1371/journal.pgen.1003530
- 16 van Meurs JB, Pare G, Schwartz SM, et al. Common genetic loci influencing plasma homocysteine concentrations and their effect on risk of coronary artery disease. *Am J Clin Nutr* 2013;98:668-76. doi: 10.3945/ajcn.112.044545
- 17 Locke AE, Kahali B, Berndt SI, et al. Genetic studies of body mass index yield new insights for obesity biology. *Nature* 2015;518:197-206. doi: 10.1038/nature14177
- 18 Shungin D, Winkler TW, Croteau-Chonka DC, et al. New genetic loci link adipose and insulin biology to body fat distribution. *Nature* 2015;518:187-96. doi: 10.1038/nature14132
- 19 Morris AP, Voight BF, Teslovich TM, et al. Large-scale association analysis provides insights into the genetic architecture and pathophysiology of type 2 diabetes. *Nat Genet* 2012;44:981-90. doi: 10.1038/ng.2383

- 20 Scott RA, Lagou V, Welch RP, et al. Large-scale association analyses identify new loci influencing glycemic traits and provide insight into the underlying biological pathways. *Nat Genet* 2012;44:991-1005. doi: 10.1038/ng.2385
- 21 Hoffmann TJ, Ehret GB, Nandakumar P, et al. Genome-wide association analyses using electronic health records identify new loci influencing blood pressure variation. *Nat Genet* 2017;49:54-64. doi: 10.1038/ng.3715
- 22 Willer CJ, Schmidt EM, Sengupta S, et al. Discovery and refinement of loci associated with lipid levels. *Nat Genet* 2013;45:1274-83. doi: 10.1038/ng.2797
- 23 Dehghan A, Dupuis J, Barbalic M, et al. Meta-analysis of genome-wide association studies in >80 000 subjects identifies multiple loci for C-reactive protein levels. *Circulation* 2011;123:731-8. doi: 10.1161/circulationaha.110.948570
- 24 Kong A, Steinthorsdottir V, Masson G, et al. Parental origin of sequence variants associated with complex diseases. *Nature* 2009;462:868-74. doi: 10.1038/nature08625
- 25 Voight BF, Scott LJ, Steinthorsdottir V, et al. Twelve type 2 diabetes susceptibility loci identified through large-scale association analysis. *Nat Genet* 2010;42:579-89. doi: 10.1038/ng.609
- 26 Dupuis J, Langenberg C, Prokopenko I, et al. New genetic loci implicated in fasting glucose homeostasis and their impact on type 2 diabetes risk. *Nat Genet* 2010;42:105-16. doi: 10.1038/ng.520
- 27 Ehret GB, Munroe PB, Rice KM, et al. Genetic variants in novel pathways influence blood pressure and cardiovascular disease risk. *Nature* 2011;478:103-9. doi: 10.1038/nature10405
